# Supplementary material for: Selective synthesis of indazoles and indoles via triazene–alkyne cyclization switched by different metals
Source: Royal Society of Chemistry journal article supplement (doi:10.1039/c3ob42088d), 2013-12-03

## Selective Synthesis of Indazoles and Indoles via Triazene–alkyne Cyclization Switched by Different Metals

Yan Fang,<sup>1</sup> Chengming Wang,<sup>1</sup> Shengqin Su,<sup>2</sup> Haizhu Yu,<sup>2,\*</sup> Yong Huang<sup>1,\*</sup>

<sup>1</sup> Key Laboratory of Chemical Genomics, School of Chemical Biology and Biotechnology, Peking University, Shenzhen Graduate School, Shenzhen (China)

<sup>2</sup> Department of Polymer Science and Engineering, University of Science and Technology Beijing, Beijing, 100083 (China)

[huangyong@pkusz.edu.cn](mailto:huangyong@pkusz.edu.cn); [yuhz@ustb.edu.cn](mailto:yuhz@ustb.edu.cn)

### Table of Contents

---

|                               |         |
|-------------------------------|---------|
| General methods and materials | S2      |
| Conditions Survey             | S3-S4   |
| Cartesian coordinates         | S5-S9   |
| Images of NMR spectra         | S10-S51 |

---

### General Methods and Materials

**General Information.** Dichloro( $\eta^5$ -pentamethylcyclopentadienyl)rhodium(III) dimer (99%) was purchased from Sinocompound Technology Co., Ltd. Cupric acetate and silver acetate was purchased from Sinopharm Chemical Reagent Co., Ltd and used directly. All other reagents were purchased and used without further purification unless specified otherwise. Solvents for chromatography were technical grade. All compounds that were purified by flash chromatography used silica gel (200-300 mesh) with the indicated solvent system according to standard techniques. Analytical thin layer chromatography (TLC) was performed on pre-coated 0.25 mm thick silica gel 60-F254 plates (*Whatman PE SILG/UV*) and visualized using UV light (254 nm).  $^1\text{H}$  NMR and  $^{13}\text{C}$  NMR data were recorded on 400 MHz nuclear resonance spectrometers. Chemical shifts ( $\delta$ ) in ppm are reported as quoted relative to the residual signals of chloroform ( $^1\text{H}$  7.268 ppm or  $^{13}\text{C}$  77.16 ppm). Multiplicities are described as: s (singlet), bs (broad singlet), d (doublet), t (triplet), q (quartet), m (multiplet); and coupling constants ( $J$ ) are reported in Hertz (Hz).  $^{13}\text{C}$  NMR spectra were recorded with total proton decoupling. HRMS (ESI) analysis with a quadrupole time-of-flight (QqTOF) mass spectrometer yielded ion mass/charge ( $m/z$ ) ratios in atomic mass units. IR spectra were measured as dry films (KBr) and are reported in terms of frequency ( $\text{cm}^{-1}$ ) and intensity of absorption.

### Conditions Screening

Initial screening quickly identified  $[\text{Cp}^*\text{RhCl}_2]_2$  was not necessary and this reaction required equivalent metal oxidants in order to achieve decent conversions. Table S1 summarized in-depth condition tuning for substrate **1a**.

**Table S1. Conditions Screening for Selective Synthesis of Isoindazoles and Indoles from the Same Triazene Substrate<sup>a</sup>**

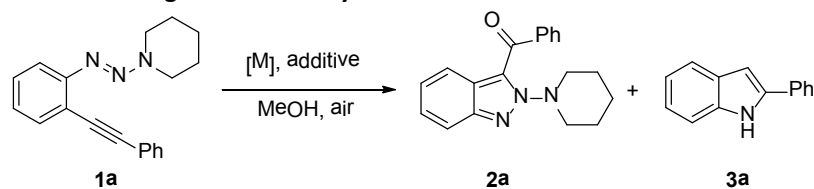

| Entry     | Catalyst<br>(0.01 eq.)         | Oxidant<br>(2.0 eq.)                                                 | additive<br>(0.01 eq.) | solvent     | Temp.     | Yield, %  |    |
|-----------|--------------------------------|----------------------------------------------------------------------|------------------------|-------------|-----------|-----------|----|
|           |                                |                                                                      |                        |             |           | 2a        | 3a |
| 1         | $[\text{RhCp}^*\text{Cl}_2]_2$ | $\text{Cu}(\text{OAc})_2 \cdot \text{H}_2\text{O}$                   | -                      | MeOH        | 90        | 44        | -  |
| 2         | $[\text{RhCp}^*\text{Cl}_2]_2$ | $\text{Cu}(\text{OAc})_2 \cdot \text{H}_2\text{O}$                   | AgOAc                  | MeOH        | 90        | -         | -  |
| 3         | $[\text{RhCp}^*\text{Cl}_2]_2$ | -                                                                    | AgOAc                  | MeOH        | 90        | -         | -  |
| 4         | -                              | $\text{Cu}(\text{OAc})_2 \cdot \text{H}_2\text{O}$                   | AgOAc                  | MeOH        | 90        | -         | -  |
| 5         | -                              | -                                                                    | -                      | MeOH        | 90        | -         | -  |
| 6         | $\text{Pd}(\text{OAc})_2$      | -                                                                    | KOAc                   | MeOH        | 90        | <5        | -  |
| 7         | -                              | $\text{Cu}(\text{OAc})_2 \cdot \text{H}_2\text{O}$                   | -                      | MeOH        | 90        | -         | -  |
| 8         | -                              | $\text{Cu}(\text{OAc})_2 \cdot \text{H}_2\text{O} (0.2)$             | -                      | MeOH        | 90        | -         | -  |
| 9         | -                              | AgOAc                                                                | -                      | MeOH        | 90        | -         | 80 |
| 10        | -                              | $\text{Ni}(\text{OAc})_2 \cdot \text{H}_2\text{O}$                   | -                      | MeOH        | 90        | -         | -  |
| 11        | -                              | $\text{CuBr}_2$                                                      | -                      | MeOH        | 90        | -         | -  |
| 12        | -                              | $\text{Cu}(\text{OAc})_2 \cdot \text{H}_2\text{O} (0.5)$             | -                      | MeOH        | 90        | 35        | -  |
| 13        | -                              | $\text{Cu}(\text{OAc})_2 \cdot \text{H}_2\text{O} (0.1)$             | -                      | MeOH        | 90        | <5        | -  |
| 14        | -                              | $\text{Cu}(\text{OAc})_2 \cdot \text{H}_2\text{O} (0.1)$             | NaOAc(2.0)             | MeOH        | 90        | <5        | -  |
| 15        | -                              | $\text{Cu}(\text{OAc})_2 \cdot \text{H}_2\text{O} (0.1)$             | CsOAc                  | MeOH        | 90        | 10        | -  |
| 16        | -                              | AgOAc(0.1)                                                           | -                      | MeOH        | 90        | -         | <5 |
| 17        | -                              | $\text{Cu}(\text{OAc})_2 \cdot \text{H}_2\text{O}$                   | -                      | MeOH        | 90        | -         | -  |
| 18        | -                              | $\text{Cu}(\text{OAc})_2 \cdot \text{H}_2\text{O}$                   | -                      | MeOH        | 90        | -         | -  |
| 19        | -                              | $\text{Cu}(\text{OTf})_2$                                            | -                      | MeOH        | 90        | -         | -  |
| 20        | -                              | $\text{CuCl}_2$                                                      | -                      | MeOH        | 90        | -         | -  |
| 21        | -                              | $\text{CuO}$                                                         | -                      | MeOH        | 90        | -         | -  |
| 22        | -                              | $\text{CuCN}$                                                        | -                      | MeOH        | 90        | -         | -  |
| 23        | -                              | $\text{Fe}(\text{OAc})_2$                                            | -                      | MeOH        | 90        | -         | -  |
| 24        | -                              | $\text{Mn}(\text{OAc})_2 \cdot 4\text{H}_2\text{O}$                  | -                      | MeOH        | 90        | -         | -  |
| 25        | -                              | AgOOCPh                                                              | -                      | MeOH        | 90        | -         | -  |
| 26        | -                              | $\text{Co}(\text{OAc})_2 \cdot 4\text{H}_2\text{O}$                  | -                      | MeOH        | 90        | -         | -  |
| 27        | -                              | $\text{Ni}(\text{OAc})_2$                                            | -                      | MeOH        | 90        | -         | -  |
| 28        | -                              | $\text{Zn}(\text{OAc})_2$                                            | -                      | MeOH        | 90        | -         | -  |
| 29        | -                              | $\text{Cu}(\text{OAc})_2 \cdot \text{H}_2\text{O} (1.2)$             | -                      | MeOH        | 90        | 70        | -  |
| 30        | -                              | $\text{Cu}(\text{OAc})_2 \cdot \text{H}_2\text{O} (1.5)$             | -                      | MeOH        | 90        | 70        | -  |
| 31        | -                              | $\text{Cu}(\text{OAc})_2 \cdot \text{H}_2\text{O} (3.0)$             | -                      | MeOH        | 90        | 68        | -  |
| <b>32</b> | -                              | <b><math>\text{Cu}(\text{OAc})_2 \cdot \text{H}_2\text{O}</math></b> | -                      | <b>MeOH</b> | <b>90</b> | <b>94</b> | -  |
| 33        | -                              | $\text{Cu}(\text{OAc})_2 \cdot \text{H}_2\text{O} (1.2)$             | -                      | MeOH        | 50        | 67        | -  |
| 34        | -                              | $\text{Cu}(\text{OAc})_2 \cdot \text{H}_2\text{O}$                   | -                      | MeCN        | 90        | 20        | -  |
| 35        | -                              | $\text{Cu}(\text{OAc})_2 \cdot \text{H}_2\text{O}$                   | -                      | MeCN        | 65        | 10        | -  |
| 36        | -                              | $\text{Cu}(\text{OAc})_2 \cdot \text{H}_2\text{O}$                   | -                      | MeCN        | 85        | 20        | -  |

|           |   |                                        |   |             |           |    |           |
|-----------|---|----------------------------------------|---|-------------|-----------|----|-----------|
| 37        | - | Cu(OAc) <sub>2</sub> ·H <sub>2</sub> O | - | MeOH        | 60        | 40 | -         |
| 38        | - | Cu(OAc) <sub>2</sub> ·H <sub>2</sub> O | - | MeOH        | r.t.      | <5 | -         |
| 39        | - | AgNO <sub>3</sub>                      | - | MeOH        | 90        | -  | -         |
| 40        | - | Ag <sub>2</sub> CO <sub>3</sub>        | - | MeOH        | 90        | -  | -         |
| <b>41</b> | - | <b>AgOAc</b>                           | - | <b>MeOH</b> | <b>90</b> | -  | <b>80</b> |
| 42        | - | AgOAc(1.0)                             | - | MeOH        | 90        | -  | 50        |
| 43        | - | AgOAc(1.2)                             | - | MeOH        | 90        | -  | 46        |
| 44        | - | AgOAc(0.5)                             | - | MeOH        | 90        | -  | 30        |
| 45        | - | AgOAc(2.5)                             | - | MeOH        | 90        | -  | 36        |

<sup>a</sup>. isolated yield; entry 1-13, Ar; entries 14-17, O<sub>2</sub>; entries 18-45, air.



**Cartesian coordinates, thermal correction to Gibbs free energy (TCG), and electronic energies in MeOH (au).**

**React**

|   |             |             |             |
|---|-------------|-------------|-------------|
| C | 1.59228800  | -3.55162300 | 0.14497600  |
| C | 1.30423700  | -2.17306500 | 0.02904200  |
| C | 2.39124600  | -1.26752700 | -0.12571300 |
| C | 3.69773400  | -1.77302200 | -0.20940900 |
| C | 3.95744600  | -3.13526700 | -0.08780500 |
| C | 2.89737500  | -4.03094100 | 0.09708300  |
| H | 0.76072500  | -4.24093500 | 0.26021200  |
| H | 4.50552700  | -1.06236900 | -0.35962600 |
| H | 4.98067300  | -3.49809300 | -0.14008400 |
| H | 3.08588600  | -5.09731900 | 0.18764000  |
| N | 2.27325800  | 0.13227200  | -0.27431000 |
| N | 1.36254400  | 0.65289700  | 0.43463300  |
| C | 0.46135000  | 2.62032900  | 1.34783200  |
| C | 2.03065800  | 2.77420000  | -0.60666000 |
| C | -0.29771000 | 3.85586600  | 0.85750800  |
| H | 1.19885700  | 2.91883200  | 2.11366500  |
| H | -0.20415000 | 1.87962500  | 1.79777700  |
| C | 1.29398000  | 4.03087900  | -1.08673600 |
| H | 2.93626000  | 3.04348400  | -0.03558400 |
| H | 2.35245300  | 2.15433400  | -1.44472800 |
| C | 0.63223500  | 4.79085000  | 0.07128000  |
| H | -0.73223400 | 4.37178100  | 1.72277900  |
| H | -1.13151400 | 3.53783700  | 0.21656900  |
| H | 2.00796300  | 4.67360700  | -1.61685200 |
| H | 0.52646400  | 3.73544400  | -1.81517900 |
| H | 0.07509300  | 5.65570300  | -0.30978900 |
| H | 1.40853300  | 5.18541000  | 0.74441700  |
| N | 1.15333700  | 1.95822500  | 0.23975700  |
| C | -0.06285500 | -1.77039200 | 0.00808100  |
| C | -1.25715800 | -1.53500900 | -0.03826400 |
| C | -2.64315700 | -1.20725800 | -0.09510900 |
| C | -3.62425200 | -2.13872500 | 0.30604400  |
| C | -3.06167500 | 0.05825100  | -0.55957300 |
| C | -4.97783400 | -1.81050000 | 0.24608000  |
| H | -3.31137100 | -3.11555000 | 0.66342900  |
| C | -4.41738400 | 0.37693800  | -0.61937500 |
| H | -2.31168300 | 0.77764800  | -0.87533200 |
| C | -5.38136600 | -0.55346100 | -0.21641400 |
| H | -5.72099400 | -2.53932300 | 0.55990000  |
| H | -4.72375100 | 1.35475000  | -0.98306700 |
| H | -6.43765200 | -0.30175500 | -0.26390700 |

TCG = 0.290028 au

E = -899.534085 au

**Inter1-Cu**

|   |            |             |             |
|---|------------|-------------|-------------|
| C | 4.14272000 | 0.43831600  | 0.08971200  |
| C | 2.73637100 | 0.32875500  | 0.32680300  |
| C | 2.09005800 | -0.92713900 | 0.00394400  |
| C | 2.86059600 | -1.97428300 | -0.54241500 |
| C | 4.22048100 | -1.80391800 | -0.77085600 |
| C | 4.87784400 | -0.59761900 | -0.45440000 |
| H | 4.60754200 | 1.38409800  | 0.35064800  |

|   |             |             |             |
|---|-------------|-------------|-------------|
| H | 2.38053600  | -2.91942400 | -0.77168100 |
| H | 4.79074200  | -2.62828100 | -1.19408200 |
| H | 5.94446800  | -0.49294400 | -0.63022300 |
| N | 0.74497100  | -1.03857000 | 0.31835600  |
| N | 0.14087700  | -2.01333100 | -0.25024900 |
| C | -1.83275500 | -3.29030300 | -0.51042200 |
| C | -1.78374100 | -1.44227100 | 1.19262100  |
| C | -3.19743100 | -2.80707500 | -1.02072600 |
| H | -1.97397900 | -4.09124800 | 0.23273600  |
| H | -1.20218600 | -3.67610300 | -1.31456400 |
| C | -3.15645900 | -0.95709300 | 0.70513200  |
| H | -1.89963000 | -2.12509600 | 2.04861100  |
| H | -1.13551300 | -0.62156100 | 1.50025100  |
| C | -3.98233100 | -2.10133100 | 0.09628100  |
| H | -3.75601700 | -3.66875300 | -1.40727100 |
| H | -3.04124300 | -2.11661500 | -1.86057900 |
| H | -3.68460200 | -0.50574200 | 1.55378000  |
| H | -3.00925500 | -0.16240200 | -0.03753800 |
| H | -4.93297700 | -1.71773300 | -0.29378300 |
| H | -4.23407700 | -2.83096100 | 0.88099700  |
| N | -1.10342000 | -2.19319500 | 0.12311900  |
| C | 2.07488500  | 1.47208500  | 0.80337000  |
| C | 0.73845900  | 1.69507900  | 1.18159000  |
| C | -0.22854200 | 2.36729800  | 0.24986600  |
| C | -1.46096600 | 2.80067700  | 0.75746700  |
| C | 0.05740200  | 2.54929300  | -1.11143200 |
| C | -2.39711500 | 3.40384500  | -0.08503200 |
| H | -1.66072400 | 2.66107900  | 1.81612500  |
| C | -0.87942300 | 3.14869700  | -1.95569000 |
| H | 1.01735900  | 2.22916800  | -1.51062300 |
| C | -2.10945400 | 3.57761600  | -1.44373600 |
| H | -3.34819500 | 3.74511400  | 0.31719900  |
| H | -0.64945900 | 3.28716300  | -3.00934600 |
| H | -2.83663300 | 4.05076600  | -2.09934300 |
| O | 0.44040800  | 1.45392300  | 2.37720500  |

TCG = 0.333609 au

E = -1324.102917 au

**Inter2-Cu**

|   |             |             |             |
|---|-------------|-------------|-------------|
| C | -0.22805000 | 3.79695600  | -0.56786400 |
| C | -0.31501100 | 2.36446900  | -0.52400300 |
| C | 0.93010100  | 1.63190100  | -0.58288000 |
| C | 2.14772600  | 2.31359600  | -0.64388500 |
| C | 2.18418000  | 3.70971000  | -0.68316600 |
| C | 0.98896800  | 4.44951600  | -0.65086200 |
| H | -1.15603500 | 4.35918300  | -0.51897100 |
| H | 3.07933600  | 1.75005000  | -0.66301300 |
| H | 3.14379200  | 4.21478900  | -0.74086400 |
| H | 1.01805600  | 5.53553100  | -0.68157200 |
| N | 0.97196700  | 0.20650700  | -0.52545100 |
| N | 0.00895500  | -0.34204700 | -1.17017900 |
| C | -1.16167600 | -2.14703300 | -2.09168100 |
| C | 0.55846700  | -2.63202000 | -0.32868200 |
| C | -2.12005200 | -3.16255200 | -1.46372600 |
| H | -0.59889400 | -2.61769800 | -2.91340000 |
| H | -1.69376800 | -1.28150300 | -2.48896700 |
| C | -0.39208300 | -3.67020800 | 0.28912900  |

|    |             |             |             |    |             |             |             |
|----|-------------|-------------|-------------|----|-------------|-------------|-------------|
| H  | 1.29400300  | -3.11559700 | -0.98885200 | C  | -1.03815200 | -4.16207000 | -0.60739500 |
| H  | 1.11174600  | -2.12043100 | 0.46345600  | H  | -2.66044500 | -3.26161200 | -1.75980000 |
| C  | -1.34498600 | -4.27693300 | -0.74847500 | H  | -2.72854200 | -2.90653300 | -0.04422100 |
| H  | -2.75864400 | -3.57265700 | -2.25568800 | H  | 0.68872500  | -4.52978800 | 0.67900900  |
| H  | -2.77719500 | -2.64519700 | -0.75268700 | H  | -0.63930500 | -3.67106700 | 1.46884300  |
| H  | 0.21987000  | -4.44603000 | 0.76459900  | H  | -1.57068800 | -5.08592500 | -0.35075700 |
| H  | -0.97383000 | -3.18581400 | 1.08426500  | H  | -0.45398000 | -4.37537500 | -1.51578700 |
| H  | -2.03690600 | -4.97455800 | -0.26176400 | N  | -0.39215900 | -1.38771700 | -0.04304000 |
| H  | -0.77058900 | -4.86035300 | -1.48365400 | C  | 1.70080500  | 0.68528300  | -0.96795700 |
| N  | -0.19374400 | -1.63608400 | -1.10747300 | C  | 2.86253500  | -0.01812200 | -1.12342300 |
| C  | -1.54542000 | 1.76036400  | -0.34045800 | C  | 3.86219000  | -0.26860500 | -0.08816000 |
| C  | -2.74106400 | 1.25760700  | -0.57531500 | C  | 4.95867900  | -1.12361400 | -0.33680900 |
| C  | -3.72069000 | 0.83428600  | 0.45048200  | C  | 3.74997600  | 0.33589700  | 1.18327500  |
| C  | -4.99479400 | 0.37204000  | 0.08110600  | C  | 5.91224100  | -1.35384100 | 0.65345100  |
| C  | -3.38825400 | 0.88961000  | 1.81640300  | H  | 5.05490000  | -1.59647300 | -1.30775900 |
| C  | -5.91216700 | -0.02638700 | 1.05818900  | C  | 4.70634500  | 0.09856900  | 2.16742800  |
| H  | -5.26372200 | 0.33105200  | -0.96858400 | H  | 2.90933000  | 0.98974600  | 1.39235400  |
| C  | -4.30600000 | 0.49436800  | 2.78695000  | C  | 5.79262800  | -0.74613100 | 1.90857700  |
| H  | -2.40381000 | 1.24532400  | 2.10962700  | H  | 6.75275700  | -2.01105800 | 0.44545200  |
| C  | -5.57428300 | 0.03252100  | 2.41214800  | H  | 4.60417400  | 0.57308900  | 3.13988100  |
| H  | -6.89526200 | -0.37977300 | 0.75693300  | H  | 6.53792400  | -0.92933300 | 2.67807100  |
| H  | -4.03247200 | 0.54529400  | 3.83783500  | O  | 3.09654400  | -0.70184800 | -2.29911100 |
| H  | -6.29003600 | -0.27575600 | 3.16988200  | H  | 2.37358200  | -0.49280900 | -2.91554900 |
| Cu | 2.54097100  | -0.48612900 | 0.40464700  | Cu | -2.63312400 | 0.72839500  | 0.52922900  |
| O  | 4.08750400  | -1.13800000 | 1.29722200  | O  | -4.45962800 | 0.76291300  | 1.02757200  |
| C  | 5.10077200  | -0.43944800 | 0.87393300  | C  | -5.10291300 | -0.14310700 | 0.35195000  |
| O  | 5.00714600  | 0.47058200  | 0.03003900  | O  | -4.56549700 | -0.90822200 | -0.46914600 |
| C  | 6.44141700  | -0.80907900 | 1.49049700  | C  | -6.59707700 | -0.21148100 | 0.63317400  |
| H  | 6.65214900  | -1.87053800 | 1.31745200  | H  | -7.06637500 | 0.74299800  | 0.36765000  |
| H  | 7.24147300  | -0.19911600 | 1.06580700  | H  | -7.06052900 | -1.01843000 | 0.06152600  |
| H  | 6.40193300  | -0.66134400 | 2.57595600  | H  | -6.76883600 | -0.36725700 | 1.70417200  |
| O  | -3.19784000 | 1.02999900  | -1.87653800 |    |             |             |             |
| H  | -2.52667400 | 1.36389700  | -2.49366900 |    |             |             |             |

E = -1400.057542 au

TCG = 0.34347 au

TCG = 0.341278 au

E = -1400.066206 au

### Inter3-Cu

### TS<sub>(2-3)</sub>-Cu

|   |             |             |             |   |             |             |             |
|---|-------------|-------------|-------------|---|-------------|-------------|-------------|
| C | 1.91306200  | 3.17626400  | -0.96521700 | C | -1.98993200 | -2.65807400 | -0.38095500 |
| C | 1.22231500  | 1.94660200  | -0.69005100 | C | -1.18413300 | -1.51411800 | -0.20014500 |
| C | -0.11869500 | 2.03221400  | -0.16071900 | C | 0.23212500  | -1.66689000 | -0.15974100 |
| C | -0.73686900 | 3.28556400  | 0.04403800  | C | 0.85570900  | -2.93266200 | -0.23556000 |
| C | -0.04204100 | 4.44176900  | -0.25068900 | C | 0.03415600  | -4.03439300 | -0.38517800 |
| C | 1.28725800  | 4.38306300  | -0.75822600 | C | -1.37525700 | -3.89791300 | -0.47019700 |
| H | 2.92674100  | 3.12980900  | -1.35258800 | H | -3.06731700 | -2.57777500 | -0.46075000 |
| H | -1.74887300 | 3.32367300  | 0.43908700  | H | 1.93879200  | -3.01547300 | -0.18757800 |
| H | -0.51094300 | 5.40792300  | -0.08803700 | H | 0.47700500  | -5.02448000 | -0.45134200 |
| H | 1.81301200  | 5.30799800  | -0.98011400 | H | -1.98668700 | -4.78485100 | -0.61196300 |
| N | -0.74515900 | 0.84702300  | 0.09559500  | N | 0.85641900  | -0.45809000 | -0.07852600 |
| N | 0.10814400  | -0.15850900 | 0.11332100  | N | -0.15057600 | 0.46628300  | -0.06742500 |
| C | -1.33739500 | -1.69774700 | -1.14251800 | C | 0.69052400  | 2.30090300  | 1.23055700  |
| C | 0.60802700  | -2.43220700 | 0.21949300  | C | 0.89138100  | 2.28110700  | -1.24826700 |
| C | -2.03911300 | -3.03276800 | -0.88644900 | C | 0.76468000  | 3.83015200  | 1.24322800  |
| H | -0.75151100 | -1.73096300 | -2.07904700 | H | 1.69239000  | 1.86630900  | 1.37005600  |
| H | -2.08016300 | -0.90337300 | -1.22142500 | H | 0.04196800  | 1.92600700  | 2.02809700  |
| C | -0.08250700 | -3.76443200 | 0.52690900  | C | 0.96252800  | 3.81041800  | -1.27294100 |
| H | 1.26020500  | -2.53921600 | -0.66385900 | H | 1.90484200  | 1.85316400  | -1.21837100 |
| H | 1.22451000  | -2.09441100 | 1.05550400  | H | 0.38291900  | 1.88804500  | -2.13410400 |
|   |             |             |             | C | 1.55143800  | 4.35961800  | 0.03498300  |

|    |             |             |             |   |             |             |             |
|----|-------------|-------------|-------------|---|-------------|-------------|-------------|
| H  | 1.23297700  | 4.14798900  | 2.18247100  | H | 3.17052300  | 1.59072700  | -0.80721600 |
| H  | -0.25389000 | 4.24266300  | 1.23614100  | H | 2.09602100  | 3.29748000  | 2.45872000  |
| H  | 1.57119500  | 4.11565700  | -2.13255500 | H | 2.69174200  | 1.75708400  | 1.82768700  |
| H  | -0.04479500 | 4.22085100  | -1.43119000 | H | 3.74652800  | 3.59496400  | 0.54048500  |
| H  | 1.54011000  | 5.45597800  | 0.02549600  | H | 2.17083500  | 4.31340600  | 0.20613300  |
| H  | 2.60345400  | 4.05236200  | 0.11919600  | N | 0.62212200  | 1.34329600  | 0.09594600  |
| N  | 0.11127600  | 1.84200500  | -0.06009700 | C | -0.09356700 | -1.53043500 | 0.80559100  |
| C  | -1.42785800 | -0.09575900 | -0.11394200 | O | -0.48706400 | -2.24342200 | 1.72859900  |
| C  | -2.60479400 | 0.67875200  | -0.12016000 | C | 1.23176900  | -1.78845100 | 0.16174200  |
| C  | -3.96832900 | 0.17360200  | 0.05469100  | C | 2.23919700  | -2.40168200 | 0.92372700  |
| C  | -5.02508600 | 0.78431600  | -0.65347400 | C | 1.45873100  | -1.52975600 | -1.19828600 |
| C  | -4.27783200 | -0.84269400 | 0.98089600  | C | 3.46464800  | -2.72256800 | 0.34090400  |
| C  | -6.34024500 | 0.36095400  | -0.46972500 | H | 2.04480300  | -2.62030700 | 1.96941200  |
| H  | -4.80111000 | 1.58716900  | -1.34858400 | C | 2.67663700  | -1.87411300 | -1.78749400 |
| C  | -5.59622700 | -1.25827500 | 1.16512200  | H | 0.67301300  | -1.08384500 | -1.80134900 |
| H  | -3.48702900 | -1.28587900 | 1.57818600  | C | 3.68505200  | -2.46172900 | -1.01684100 |
| C  | -6.63266300 | -0.66523200 | 0.43580700  | H | 4.24533400  | -3.18382300 | 0.94029700  |
| H  | -7.14028200 | 0.83383800  | -1.03354900 | H | 2.83790300  | -1.68788300 | -2.84627800 |
| H  | -5.81631900 | -2.03679100 | 1.89116800  | H | 4.63639300  | -2.72249200 | -1.47381300 |
| H  | -7.65915900 | -0.99136600 | 0.58082300  |   |             |             |             |
| O  | -2.54069800 | 2.02378800  | -0.30373600 |   |             |             |             |
| Cu | 2.74816900  | -0.20726800 | 0.06392700  |   |             |             |             |
| O  | 4.63205400  | 0.02368600  | 0.21201100  |   |             |             |             |
| C  | 5.12248200  | -1.18088500 | 0.17030000  |   |             |             |             |
| O  | 4.41853300  | -2.20186500 | 0.05390500  |   |             |             |             |
| C  | 6.63679500  | -1.27067100 | 0.27419900  |   |             |             |             |
| H  | 6.96446700  | -2.31148900 | 0.23192000  |   |             |             |             |
| H  | 7.09922400  | -0.70398000 | -0.54211100 |   |             |             |             |
| H  | 6.97214300  | -0.81524300 | 1.21305300  |   |             |             |             |
| H  | -1.57753400 | 2.27824500  | -0.29049400 |   |             |             |             |

E = -974.8176963 au  
 TCG = 0.299612 au

**Inter1-Ag**

|   |             |             |             |
|---|-------------|-------------|-------------|
| C | -1.16599800 | 3.46601400  | -0.07824200 |
| C | -0.59394200 | 2.17623000  | -0.05319600 |
| C | 0.81961300  | 2.04568800  | -0.05829900 |
| C | 1.61034500  | 3.20481000  | -0.10893000 |
| C | 1.02551200  | 4.46781900  | -0.12767100 |
| C | -0.36737300 | 4.60322200  | -0.11161600 |
| H | -2.24772100 | 3.55509700  | -0.06908000 |
| H | 2.68874100  | 3.10370200  | -0.14253100 |
| H | 1.65941600  | 5.34893300  | -0.16746000 |
| H | -0.82676600 | 5.58664500  | -0.13465200 |
| N | 1.40560100  | 0.74366900  | -0.05847600 |
| N | 2.61827100  | 0.73178400  | 0.34839600  |
| C | 4.56498900  | -0.37370400 | 1.04975100  |
| C | 2.84748300  | -1.63377000 | -0.32249100 |
| C | 5.69279900  | -1.11819300 | 0.33499600  |
| H | 4.34618800  | -0.85566000 | 2.01469400  |
| H | 4.80984700  | 0.67238600  | 1.24459400  |
| C | 3.99727900  | -2.41261600 | -0.98839800 |
| H | 2.38117300  | -2.24072800 | 0.47372800  |
| H | 2.09347000  | -1.39692000 | -1.07979800 |
| C | 5.23424300  | -2.51911500 | -0.08925900 |
| H | 6.55187300  | -1.17388900 | 1.01294300  |
| H | 6.01207300  | -0.54484900 | -0.54523500 |
| H | 3.61855900  | -3.40429600 | -1.26158800 |
| H | 4.26553500  | -1.90294000 | -1.92251500 |
| H | 6.03583400  | -3.03990300 | -0.62419100 |
| H | 5.00374300  | -3.12270800 | 0.80081200  |
| N | 3.32081700  | -0.36941700 | 0.25219100  |
| C | -1.50326600 | 1.05854600  | -0.01261100 |
| C | -2.51857700 | 0.35502300  | 0.03556100  |
| C | -3.73975000 | -0.39004600 | 0.08354800  |
| C | -4.47043300 | -0.62391400 | -1.10108900 |
| C | -4.23802300 | -0.86437400 | 1.31578300  |
| C | -5.67723000 | -1.31860500 | -1.04739200 |

E = -1400.131599 au  
 TCG = 0.350235 au

**Prod-Cu**

|   |             |             |             |
|---|-------------|-------------|-------------|
| C | -2.75983100 | 0.74615500  | -0.39260900 |
| C | -2.39846900 | -0.54107800 | 0.12386100  |
| C | -3.38460000 | -1.53967000 | 0.31678600  |
| C | -4.68866600 | -1.22688800 | -0.00844900 |
| C | -5.04577100 | 0.05559700  | -0.52706200 |
| C | -4.10557900 | 1.04412000  | -0.72625400 |
| C | -1.00119200 | -0.47565400 | 0.29489300  |
| H | -3.11647600 | -2.50899600 | 0.72475600  |
| H | -5.46997500 | -1.96844400 | 0.13629700  |
| H | -6.08801600 | 0.25034000  | -0.76691700 |
| H | -4.37060600 | 2.02062900  | -1.12079800 |
| N | -1.68263500 | 1.55971400  | -0.48434700 |
| N | -0.65389900 | 0.79300000  | -0.09173500 |
| C | 1.08873300  | 2.05990900  | -1.10724700 |
| C | 0.64889300  | 2.19964900  | 1.30423900  |
| C | 2.54470100  | 2.48816000  | -0.89822600 |
| H | 0.45301400  | 2.93598600  | -1.31083000 |
| H | 1.00073400  | 1.37762500  | -1.95800600 |
| C | 2.08907700  | 2.64086300  | 1.57955300  |
| H | -0.00674800 | 3.07536100  | 1.16468000  |
| H | 0.25495400  | 1.61031200  | 2.13822700  |
| C | 2.69091000  | 3.35621300  | 0.36081300  |
| H | 2.88336200  | 3.03532800  | -1.78716700 |

|    |             |             |             |
|----|-------------|-------------|-------------|
| H  | -4.09107500 | -0.25128200 | -2.04810300 |
| C  | -5.44542300 | -1.55861600 | 1.35621500  |
| H  | -3.68201200 | -0.67386600 | 2.22922300  |
| C  | -6.16487800 | -1.78752000 | 0.17765000  |
| H  | -6.23951500 | -1.49167600 | -1.96037800 |
| H  | -5.82862700 | -1.91716600 | 2.30714600  |
| H  | -7.10675900 | -2.32746500 | 0.21459100  |
| Ag | -0.21917100 | -0.90057300 | -0.12048600 |

E = -1045.243684 au

TCG = 0.28741 au

**Inter2-Ag**

|    |             |             |             |
|----|-------------|-------------|-------------|
| C  | 2.26962100  | -2.78973400 | -0.10496800 |
| C  | 1.23496400  | -1.83655400 | -0.04151000 |
| C  | -0.12062900 | -2.26735300 | 0.00752900  |
| C  | -0.38002000 | -3.65138900 | -0.01729000 |
| C  | 0.65778800  | -4.57501000 | -0.07618100 |
| C  | 1.99375800  | -4.15037800 | -0.12122000 |
| H  | 3.30466900  | -2.45123500 | -0.14315700 |
| H  | -1.41071600 | -3.98593000 | 0.00624900  |
| H  | 0.42704800  | -5.63661200 | -0.09434500 |
| H  | 2.80248500  | -4.87250100 | -0.17357000 |
| N  | -1.10625300 | -1.26581900 | 0.04937200  |
| N  | -2.27479100 | -1.72553700 | 0.29263200  |
| C  | -4.56292000 | -1.37372500 | 0.74814800  |
| C  | -3.13206200 | 0.56788000  | 0.01599000  |
| C  | -5.70960200 | -0.88171700 | -0.14090900 |
| H  | -4.70717600 | -1.01566900 | 1.77963200  |
| H  | -4.49464100 | -2.46327300 | 0.77459300  |
| C  | -4.29083000 | 1.07674300  | -0.85464900 |
| H  | -3.12096000 | 1.08365400  | 0.98921800  |
| H  | -2.16588900 | 0.72980500  | -0.46080500 |
| C  | -5.65799600 | 0.64401500  | -0.30613600 |
| H  | -6.65953700 | -1.19464900 | 0.30795100  |
| H  | -5.64042300 | -1.36696500 | -1.12376600 |
| H  | -4.22319200 | 2.16979700  | -0.91558900 |
| H  | -4.16456700 | 0.68948600  | -1.87467200 |
| H  | -6.45681400 | 0.98166500  | -0.97621500 |
| H  | -5.83663400 | 1.12598800  | 0.66665700  |
| N  | -3.26971800 | -0.87447900 | 0.26291100  |
| C  | 1.49601000  | -0.41876100 | -0.01872900 |
| C  | 1.10396000  | 0.76958600  | 0.01006200  |
| C  | 0.66965900  | 2.11912900  | 0.05351700  |
| C  | 0.44806500  | 2.75472200  | 1.29862100  |
| C  | 0.42376200  | 2.82688100  | -1.14741600 |
| C  | -0.00722700 | 4.06913800  | 1.33502200  |
| H  | 0.63015700  | 2.20552700  | 2.21757200  |
| C  | -0.03051100 | 4.14125200  | -1.09714800 |
| H  | 0.58766200  | 2.33336000  | -2.10083200 |
| C  | -0.24421100 | 4.76231100  | 0.14057700  |
| H  | -0.17783300 | 4.55625700  | 2.29054200  |
| H  | -0.21914700 | 4.68407500  | -2.01866200 |
| H  | -0.59623800 | 5.78961500  | 0.17430000  |
| Ag | 3.65335400  | 0.27609000  | -0.03530600 |

E = -1045.230099 au

TCG = 0.284123 au

**TS<sub>(2-3)</sub>-Ag**

|    |             |             |             |
|----|-------------|-------------|-------------|
| C  | -2.79596100 | 2.52059100  | -0.13997200 |
| C  | -1.69653500 | 1.65830400  | -0.07704900 |
| C  | -0.39357600 | 2.18908000  | 0.03362900  |
| C  | -0.19563500 | 3.57383900  | 0.07492500  |
| C  | -1.30400500 | 4.42086100  | 0.02235800  |
| C  | -2.60050600 | 3.90113000  | -0.09145400 |
| H  | -3.79976600 | 2.11102600  | -0.22466000 |
| H  | 0.80956600  | 3.97610400  | 0.14179900  |
| H  | -1.15456200 | 5.49619700  | 0.05823400  |
| H  | -3.45264200 | 4.57175000  | -0.14639600 |
| N  | 0.62486600  | 1.21648800  | 0.02383500  |
| N  | 1.74648800  | 1.61024600  | 0.50594000  |
| C  | 4.00738200  | 1.34517800  | 1.08944100  |
| C  | 2.94227900  | -0.28722400 | -0.52907200 |
| C  | 5.22974100  | 1.47066700  | 0.17461000  |
| H  | 4.20079500  | 0.60802300  | 1.88200500  |
| H  | 3.74032000  | 2.29174200  | 1.56346000  |
| C  | 4.18269900  | -0.15980100 | -1.42890000 |
| H  | 3.00570300  | -1.18413300 | 0.09978400  |
| H  | 2.02973500  | -0.34720500 | -1.12022600 |
| C  | 5.44720200  | 0.18270800  | -0.63102400 |
| H  | 6.10325400  | 1.69985200  | 0.79576800  |
| H  | 5.08696900  | 2.31952700  | -0.50729800 |
| H  | 4.30320600  | -1.10590600 | -1.96987200 |
| H  | 3.99890900  | 0.61839900  | -2.18148900 |
| H  | 6.29959800  | 0.29780500  | -1.30955500 |
| H  | 5.69488500  | -0.64459700 | 0.05026800  |
| N  | 2.81713500  | 0.89279300  | 0.34526400  |
| C  | -1.71856100 | 0.20350300  | -0.07677900 |
| C  | -0.64234000 | -0.51149100 | -0.03100100 |
| C  | 0.06018800  | -1.75194800 | 0.09978900  |
| C  | 0.48171800  | -2.20071100 | 1.37117200  |
| C  | 0.30191600  | -2.55685600 | -1.03558200 |
| C  | 1.12460600  | -3.43006600 | 1.50003600  |
| H  | 0.29095500  | -1.58265300 | 2.24385700  |
| C  | 0.93565500  | -3.79026900 | -0.89605800 |
| H  | -0.02136900 | -2.20938500 | -2.01282700 |
| C  | 1.35053300  | -4.22535700 | 0.36887300  |
| H  | 1.44074800  | -3.77544500 | 2.48023600  |
| H  | 1.10661900  | -4.41294600 | -1.76952500 |
| H  | 1.84477000  | -5.18718000 | 0.47447700  |
| Ag | -3.53506200 | -0.95511700 | -0.07363700 |

E = -1045.215552 au

TCG = 0.289402 au

**Inter3-Ag**

|   |             |             |             |
|---|-------------|-------------|-------------|
| C | 0.46557800  | -1.82624400 | -0.38012100 |
| C | -0.91009200 | -1.96444500 | -0.08697700 |
| C | -1.46814400 | -3.24372200 | -0.06639600 |
| C | -0.66557200 | -4.34726100 | -0.37586600 |
| C | 0.67660200  | -4.17756300 | -0.73897400 |
| C | 1.26259600  | -2.90523200 | -0.75813500 |
| C | -0.56267200 | 0.28031200  | -0.25616400 |
| C | -1.52182300 | -0.64212500 | 0.02051000  |
| H | -2.52373600 | -3.37193100 | 0.15750700  |

|    |             |             |             |    |             |             |             |
|----|-------------|-------------|-------------|----|-------------|-------------|-------------|
| H  | -1.09417200 | -5.34498800 | -0.36337200 | C  | 2.41443200  | -1.96049100 | -0.64550200 |
| H  | 1.27635900  | -5.03944000 | -1.01501800 | C  | 2.55226300  | -0.01413300 | 0.77819400  |
| H  | 2.29222100  | -2.79303700 | -1.07592900 | C  | 3.80724000  | -2.06082900 | -0.64386300 |
| N  | 0.71004300  | -0.41436800 | -0.43919200 | H  | 1.82807900  | -2.66435200 | -1.23126100 |
| C  | -0.61502800 | 1.75688600  | -0.28364100 | C  | 3.94435800  | -0.10983200 | 0.77164100  |
| C  | -0.27469300 | 2.48285800  | -1.43853300 | H  | 2.06250200  | 0.75976600  | 1.36213600  |
| C  | -1.06233000 | 2.45520300  | 0.85165400  | C  | 4.58041700  | -1.13443600 | 0.06209800  |
| C  | -0.38554400 | 3.87398500  | -1.45690100 | H  | 4.28896600  | -2.85762400 | -1.20543300 |
| H  | 0.05856900  | 1.95627200  | -2.32847700 | H  | 4.53471300  | 0.60746500  | 1.33694600  |
| C  | -1.17132200 | 3.84815400  | 0.83131000  | H  | 5.66459100  | -1.21150700 | 0.06282200  |
| H  | -1.31176100 | 1.90217200  | 1.75345000  | Ag | -0.02732700 | 2.26884000  | -0.15024300 |
| C  | -0.83300300 | 4.56019400  | -0.32266900 | H  | -0.09994200 | -2.92561900 | 0.25790100  |
| H  | -0.13157300 | 4.42254200  | -2.35983100 |    |             |             |             |
| H  | -1.51483700 | 4.37528000  | 1.71727400  |    |             |             |             |
| H  | -0.91888800 | 5.64311700  | -0.33993500 |    |             |             |             |
| N  | 1.77782600  | 0.29423400  | -0.68223600 |    |             |             |             |
| C  | 3.36511100  | -1.13159200 | 0.61597200  |    |             |             |             |
| C  | 4.05256300  | 0.72293700  | -0.94812200 |    |             |             |             |
| C  | 4.14011100  | -0.42077400 | 1.74291500  |    |             |             |             |
| H  | 3.99518900  | -1.88358200 | 0.12690200  |    |             |             |             |
| H  | 2.47891600  | -1.62194600 | 1.00912000  |    |             |             |             |
| C  | 4.83150700  | 1.41769600  | 0.17462800  |    |             |             |             |
| H  | 4.70922700  | 0.06060500  | -1.52628300 |    |             |             |             |
| H  | 3.58376300  | 1.43083700  | -1.63268900 |    |             |             |             |
| C  | 5.31989100  | 0.40293900  | 1.21506400  |    |             |             |             |
| H  | 4.47757500  | -1.19911100 | 2.43758300  |    |             |             |             |
| H  | 3.44611900  | 0.22483900  | 2.29655100  |    |             |             |             |
| H  | 5.67103800  | 1.95752000  | -0.27794100 |    |             |             |             |
| H  | 4.18343300  | 2.16707700  | 0.64756500  |    |             |             |             |
| H  | 5.81543100  | 0.91803400  | 2.04500800  |    |             |             |             |
| H  | 6.06936600  | -0.26357800 | 0.76482600  |    |             |             |             |
| N  | 2.96431100  | -0.13416000 | -0.41229100 |    |             |             |             |
| Ag | -3.54446600 | -0.18327400 | 0.39707200  |    |             |             |             |

E = -1045.229566 au

TCG = 0.293336 au

#### Inter4-Ag

|   |             |             |            |
|---|-------------|-------------|------------|
| C | -1.81153800 | -1.68292600 | 0.07956200 |
| C | -1.89872800 | -0.25965400 | 0.05055100 |
| C | -3.17553000 | 0.33263600  | 0.03508200 |
| C | -4.30643000 | -0.47679600 | 0.06818400 |
| C | -4.19204800 | -1.88409900 | 0.11279300 |
| C | -2.94464000 | -2.50438900 | 0.11746000 |
| C | 0.29396500  | -0.83583900 | 0.06599500 |
| C | -0.55465400 | 0.25733500  | 0.04463800 |
| H | -3.27040200 | 1.41636300  | 0.00299600 |
| H | -5.29461800 | -0.02373000 | 0.06134100 |
| H | -5.09162600 | -2.49370300 | 0.14062800 |
| H | -2.85801500 | -3.58842400 | 0.14536400 |
| N | -0.47122200 | -2.00845200 | 0.05339700 |
| C | 1.76067600  | -0.93237400 | 0.06220300 |

E = -740.0341223 au

TCG = 0.157598 au

#### Prod-Ag

|   |             |             |             |
|---|-------------|-------------|-------------|
| C | -1.83921200 | -0.63961200 | 0.11799100  |
| C | -1.89583900 | 0.75864100  | -0.14523100 |
| C | -3.15547000 | 1.37615600  | -0.26789400 |
| C | -4.30268400 | 0.60628700  | -0.11098400 |
| C | -4.22143400 | -0.77693500 | 0.16403600  |
| C | -2.99074200 | -1.41809800 | 0.28027300  |
| C | 0.28916400  | 0.13503300  | -0.02208200 |
| C | -0.54100100 | 1.21994700  | -0.22568300 |
| H | -3.22830800 | 2.44054400  | -0.47807600 |
| H | -5.28024600 | 1.07310000  | -0.19977200 |
| H | -5.13575500 | -1.35212900 | 0.28401200  |
| H | -2.93077200 | -2.48425500 | 0.48595700  |
| N | -0.50472200 | -0.99417500 | 0.16088500  |
| C | 1.75270000  | 0.05281900  | -0.01142300 |
| C | 2.42439400  | -1.13782700 | -0.34797800 |
| C | 2.52549400  | 1.17714700  | 0.33716300  |
| C | 3.81874400  | -1.20268900 | -0.33198200 |
| H | 1.85696600  | -2.01138200 | -0.65987300 |
| C | 3.91786700  | 1.11335100  | 0.34229600  |
| H | 2.02548400  | 2.09831900  | 0.62306600  |
| C | 4.57306700  | -0.07799000 | 0.01194500  |
| H | 4.31563200  | -2.13148200 | -0.60099600 |
| H | 4.49400100  | 1.99340200  | 0.61699700  |
| H | 5.65863600  | -0.12786100 | 0.02212100  |
| H | -0.15759500 | -1.88280700 | 0.49055000  |
| H | -0.21527600 | 2.22639000  | -0.45286400 |

E = -594.8281719 au

TCG = 0.173087 au

NMR Spectra Images of Triazene Substrates and Products

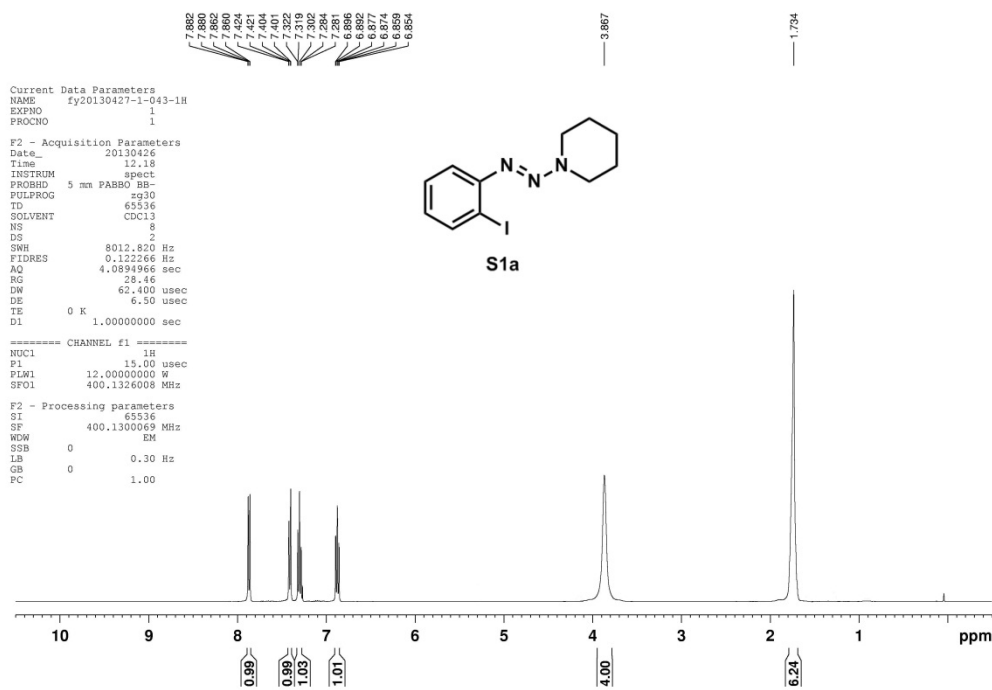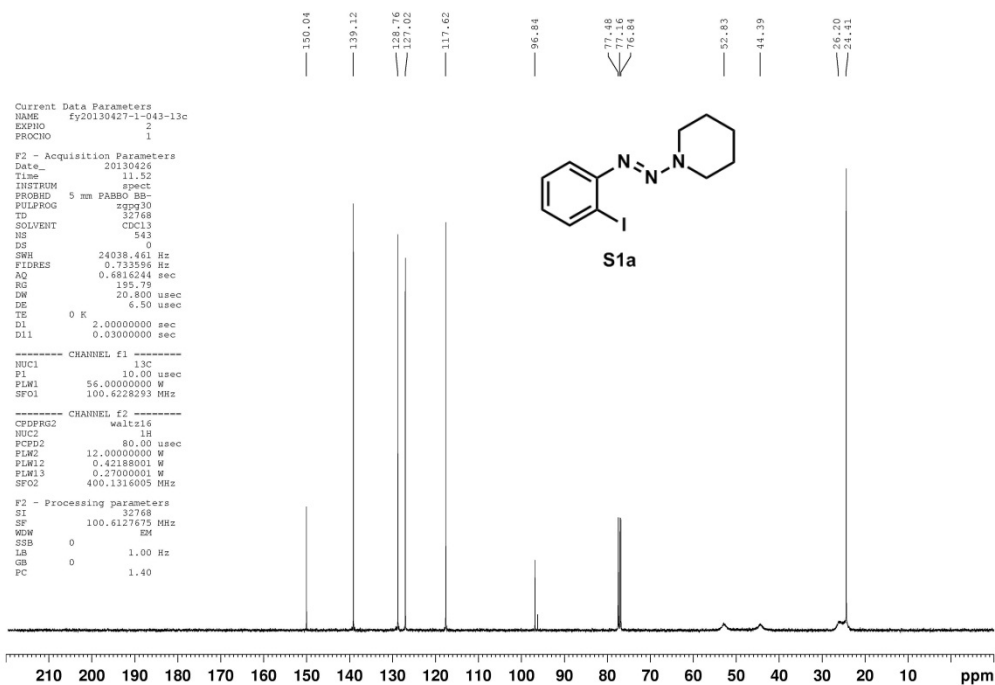

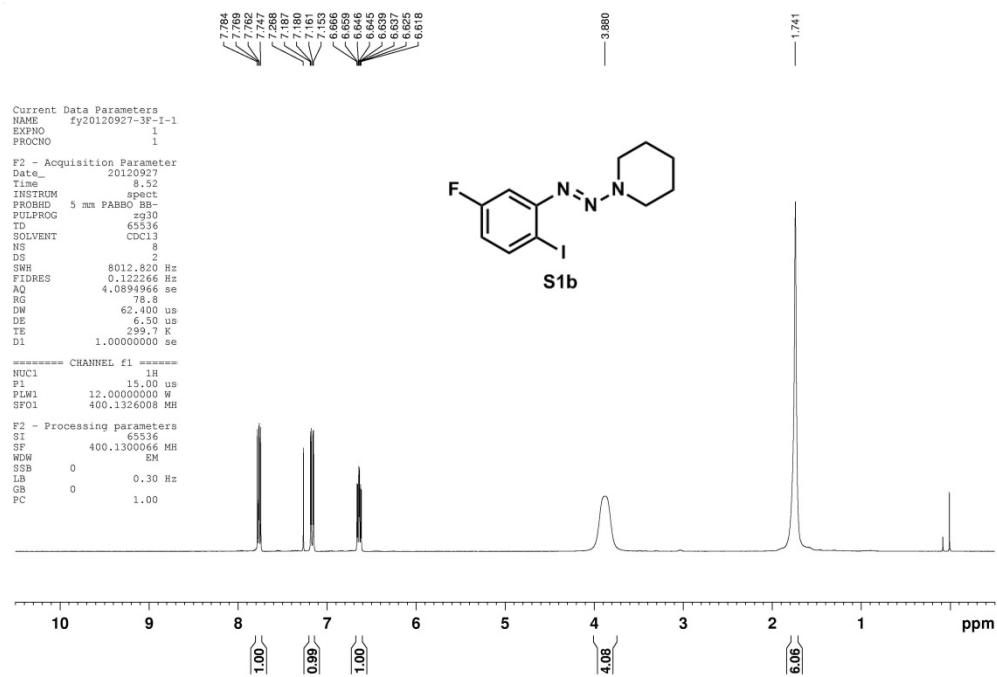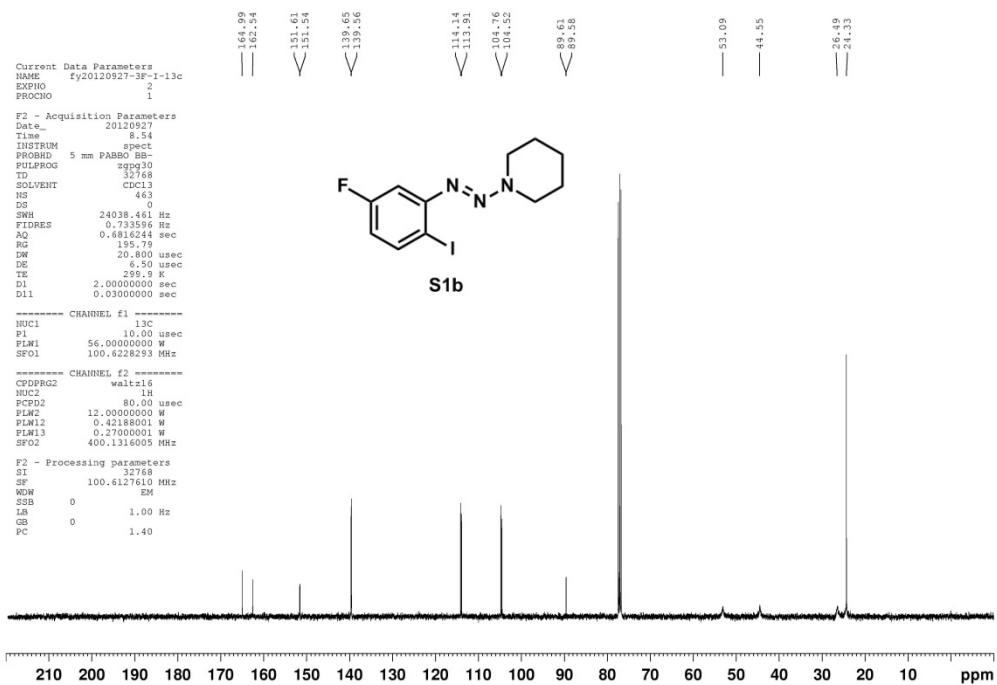



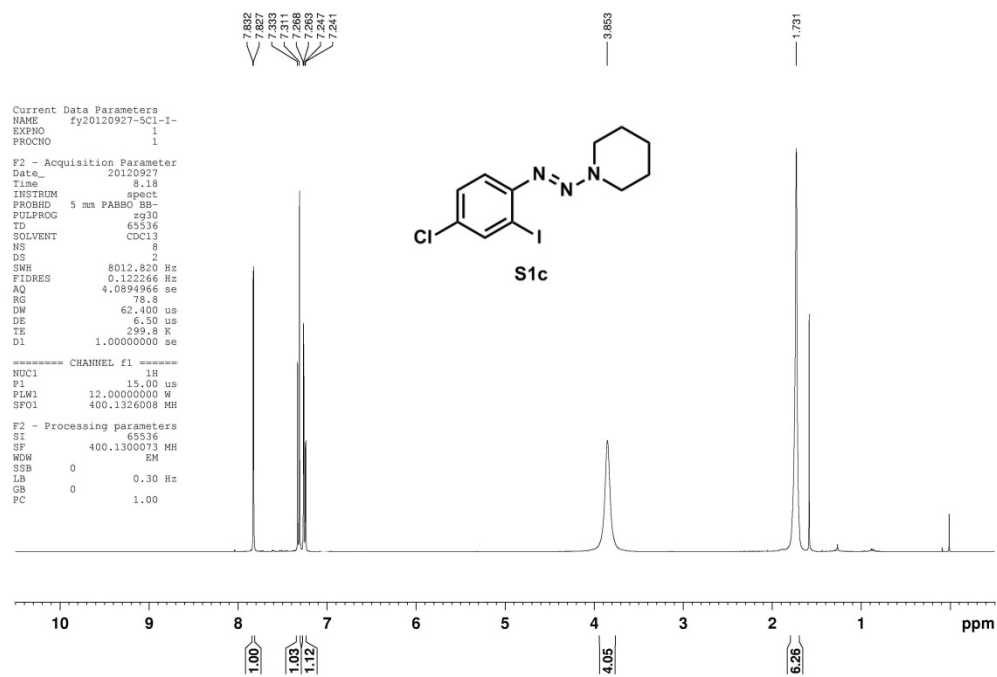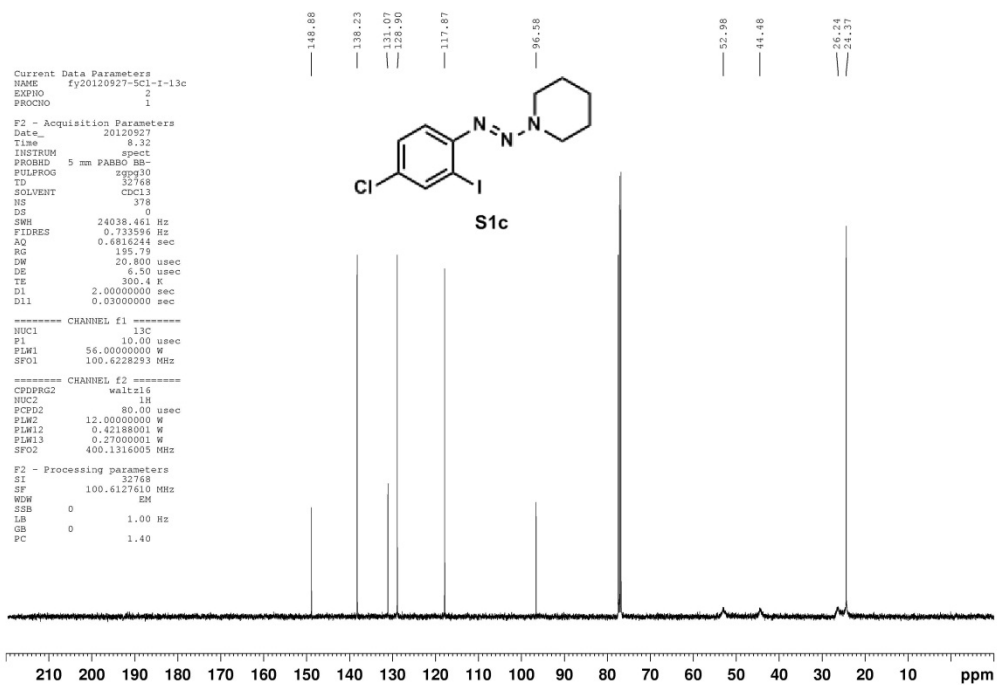



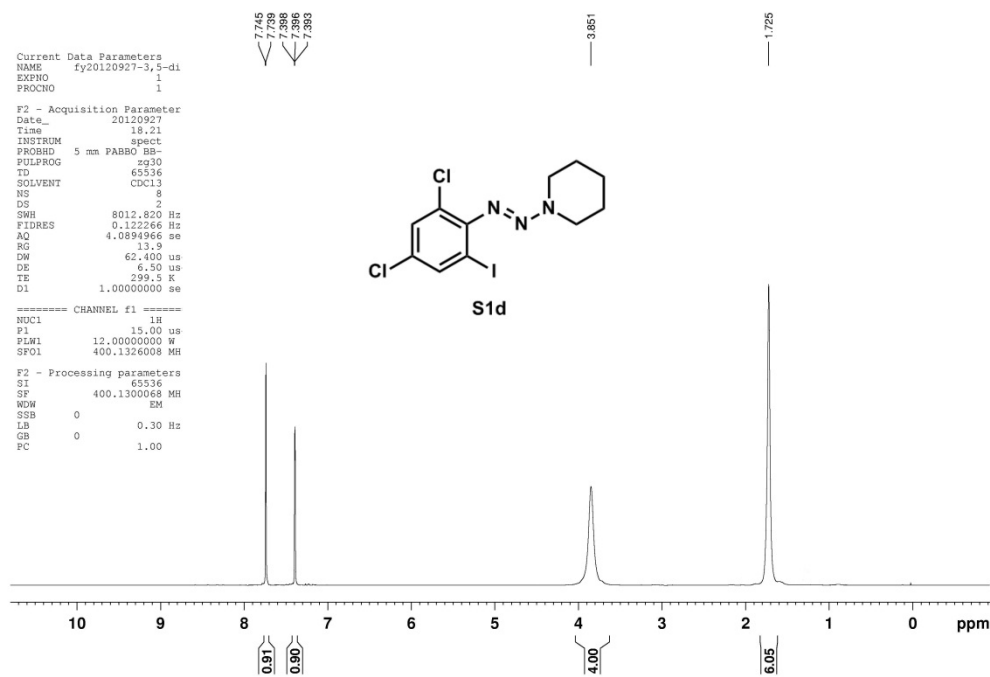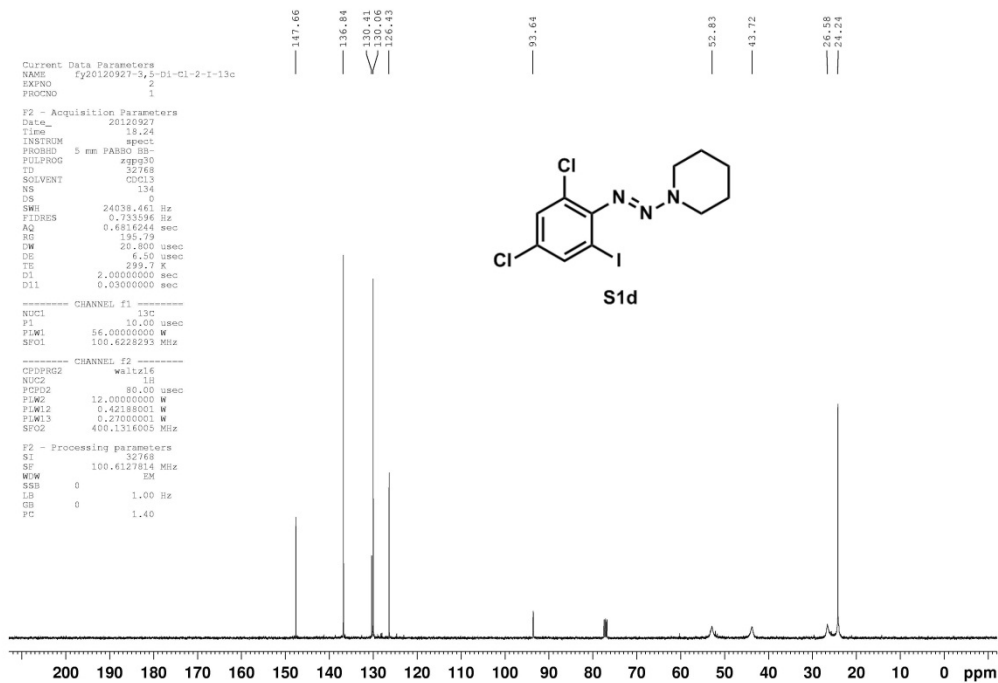

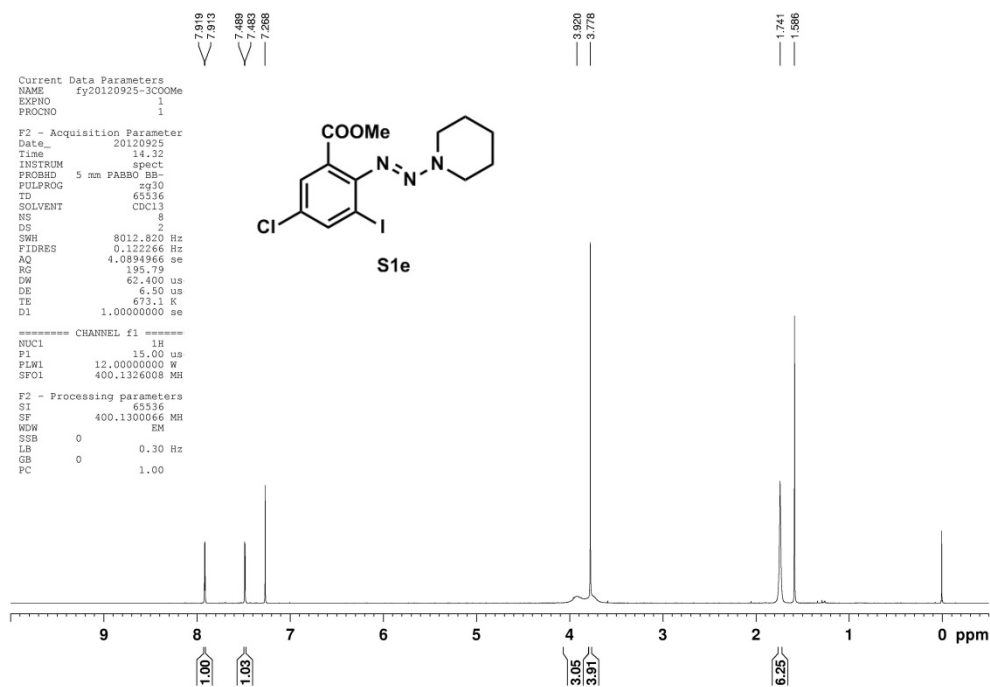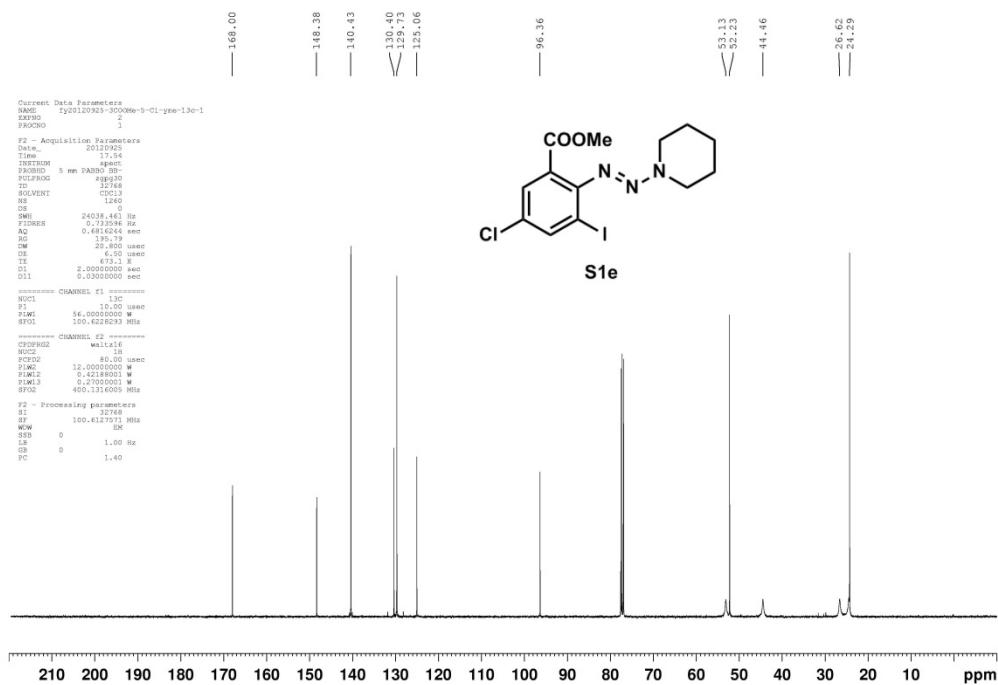

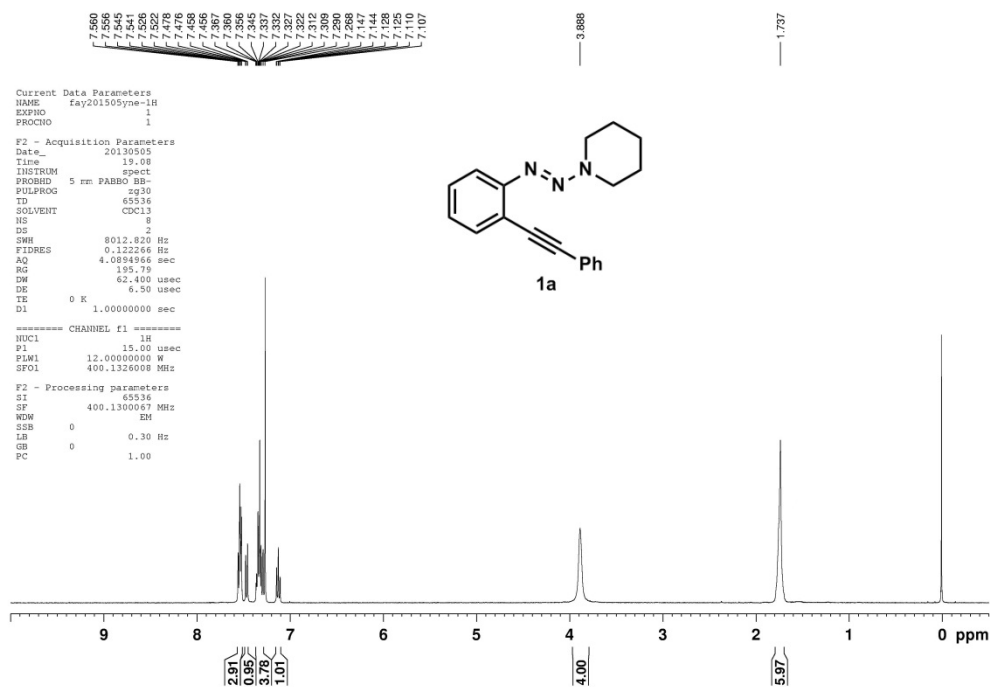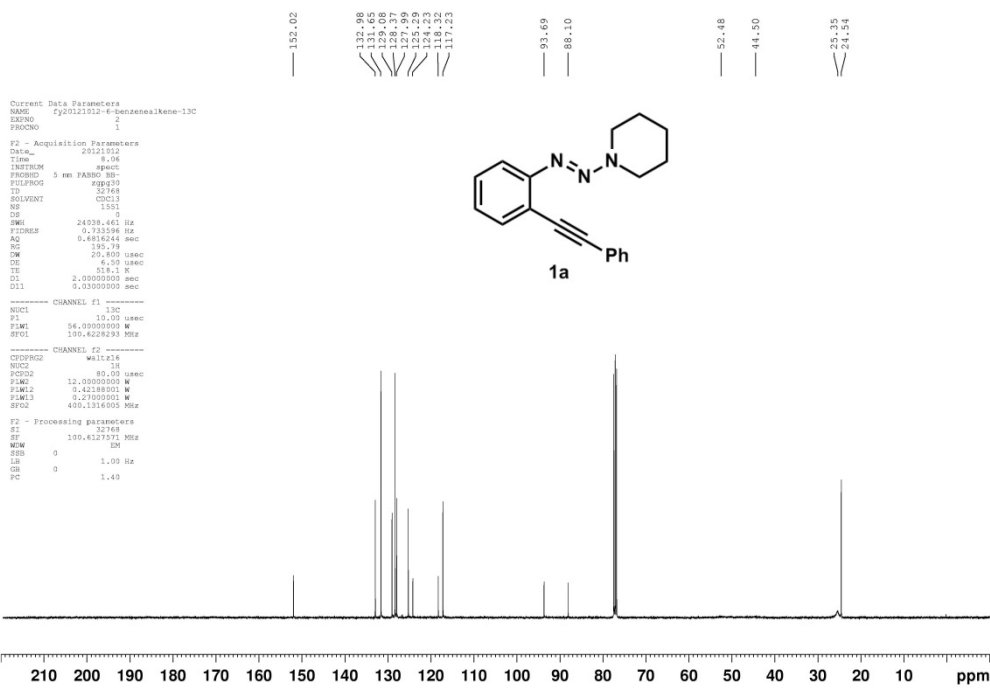

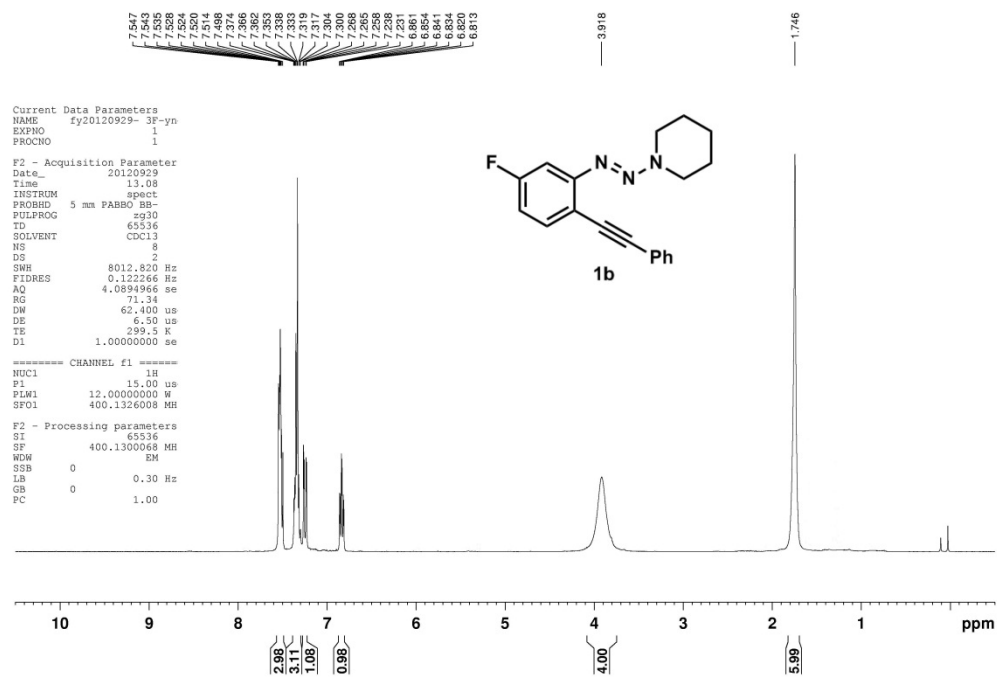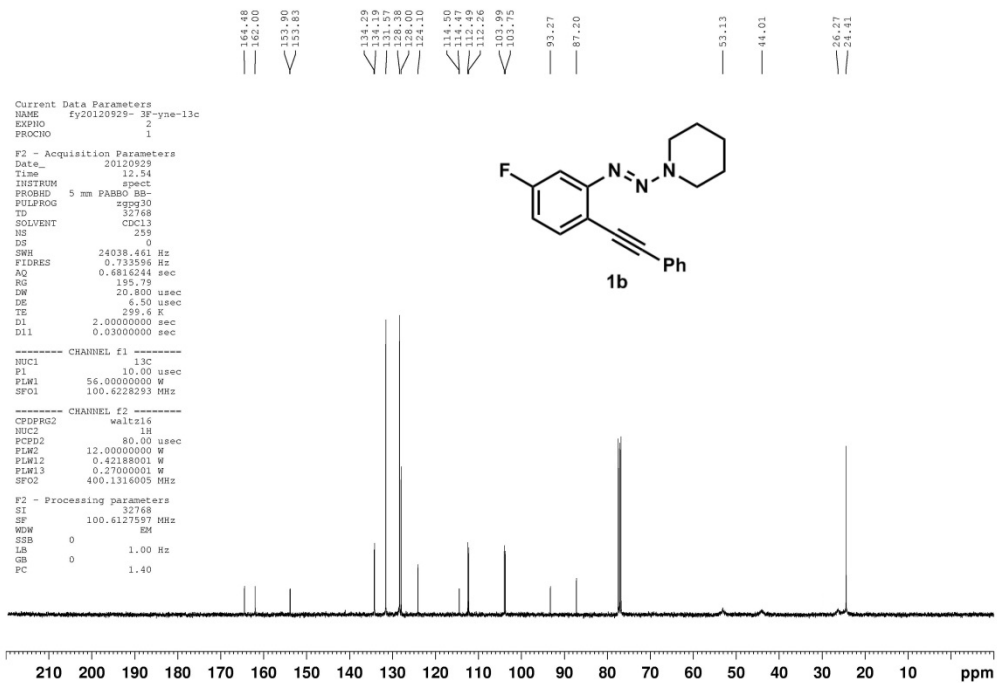

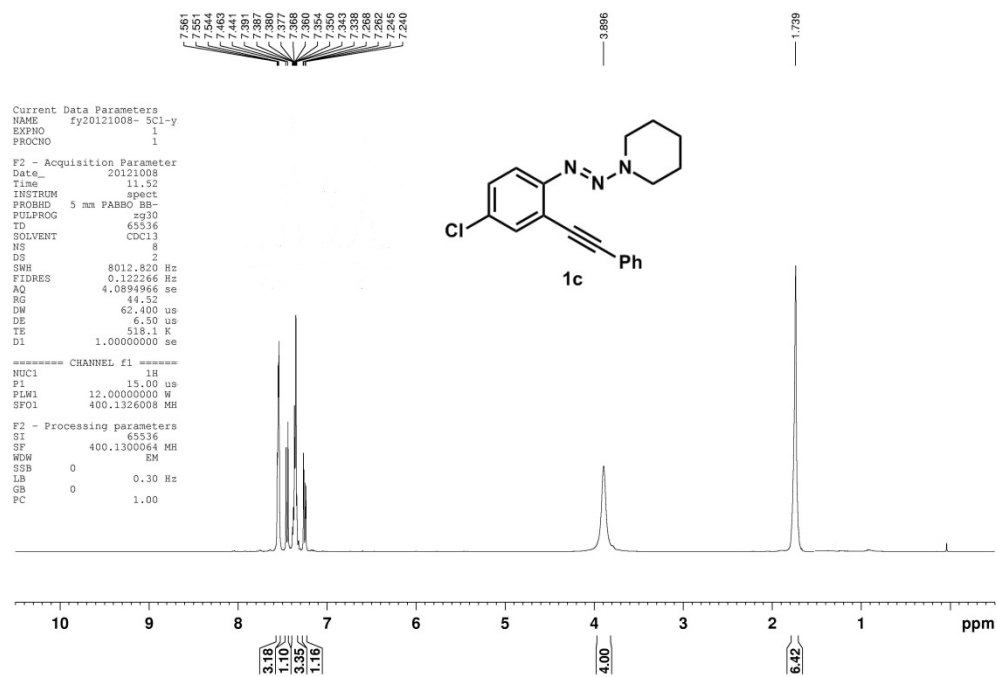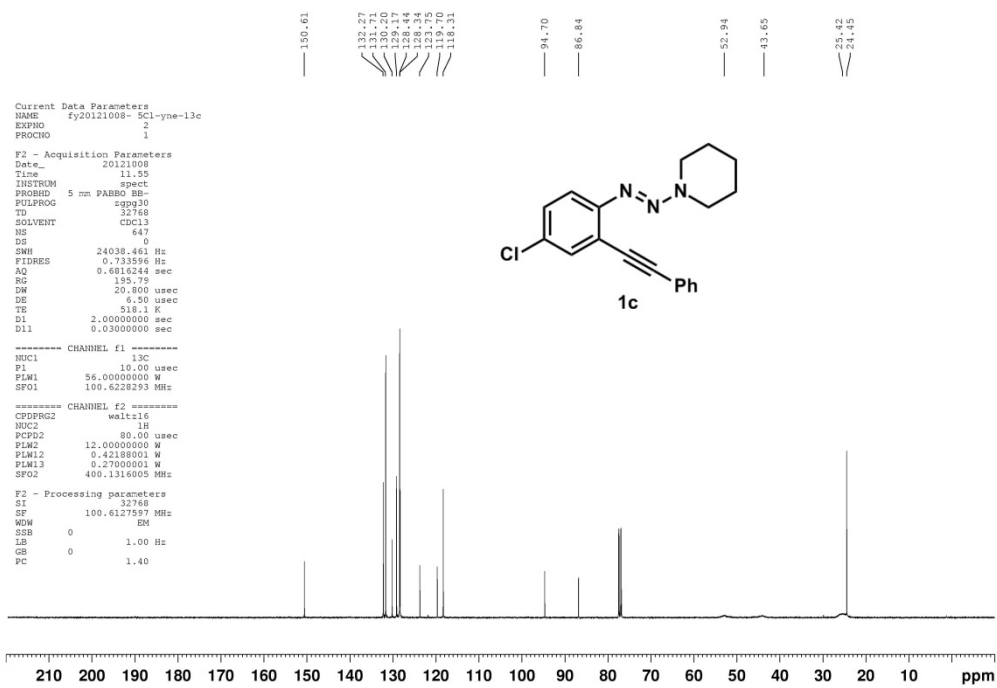

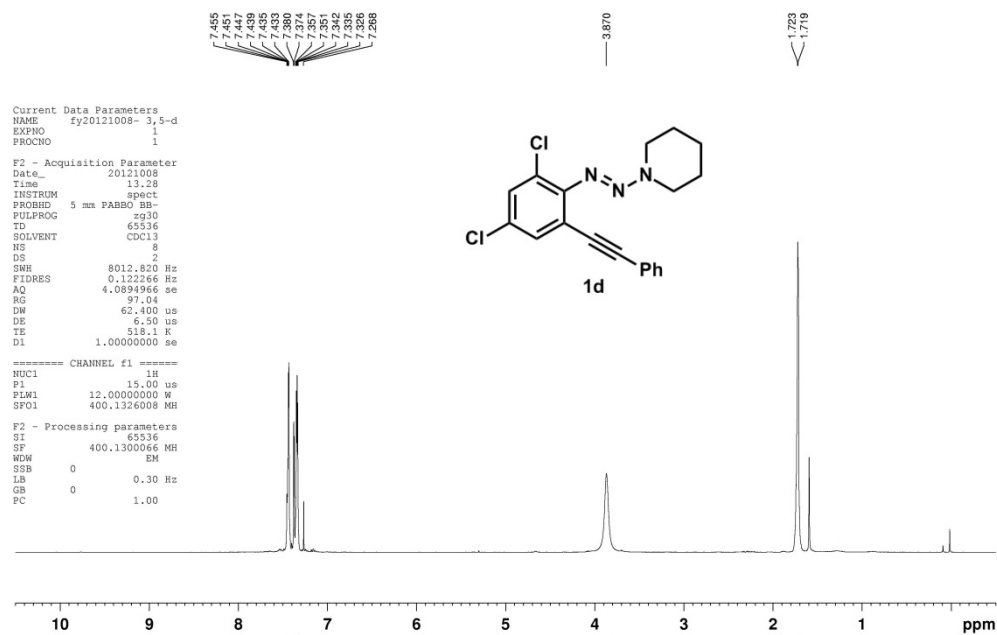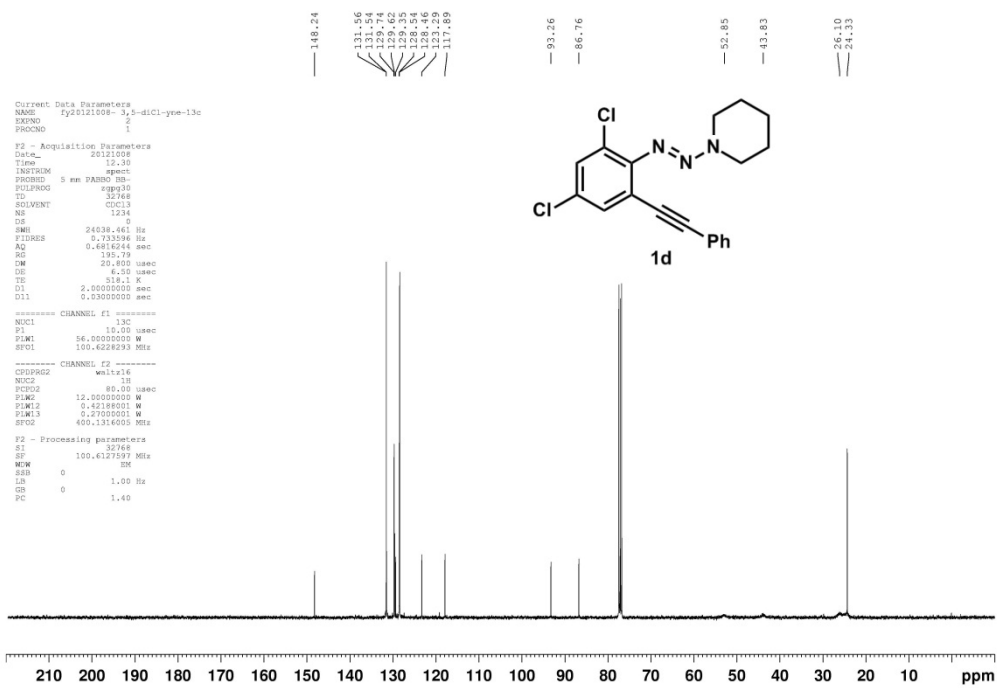

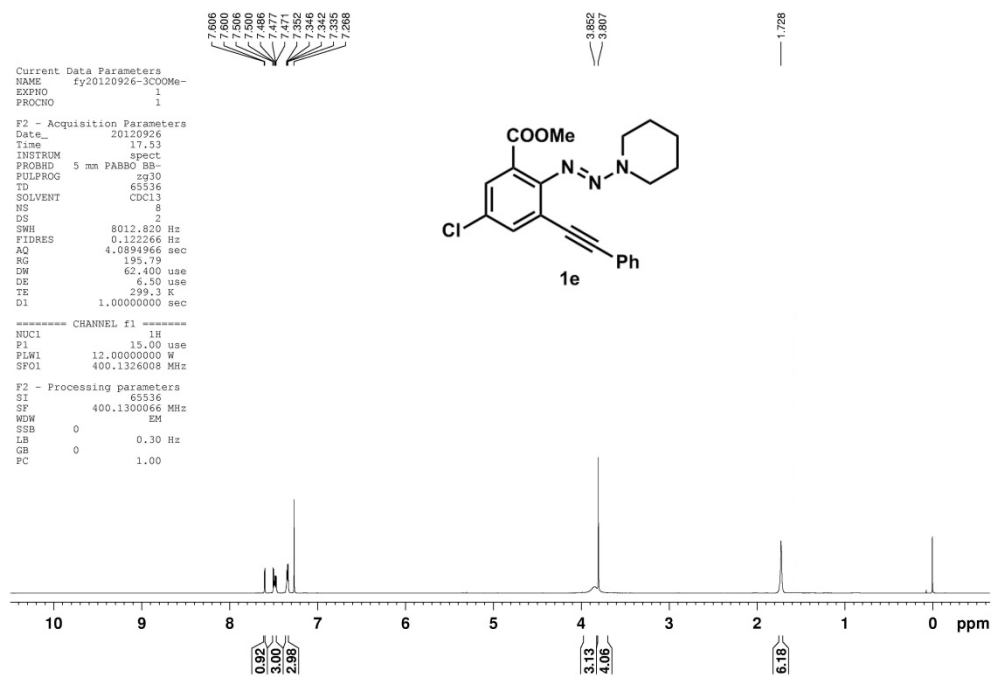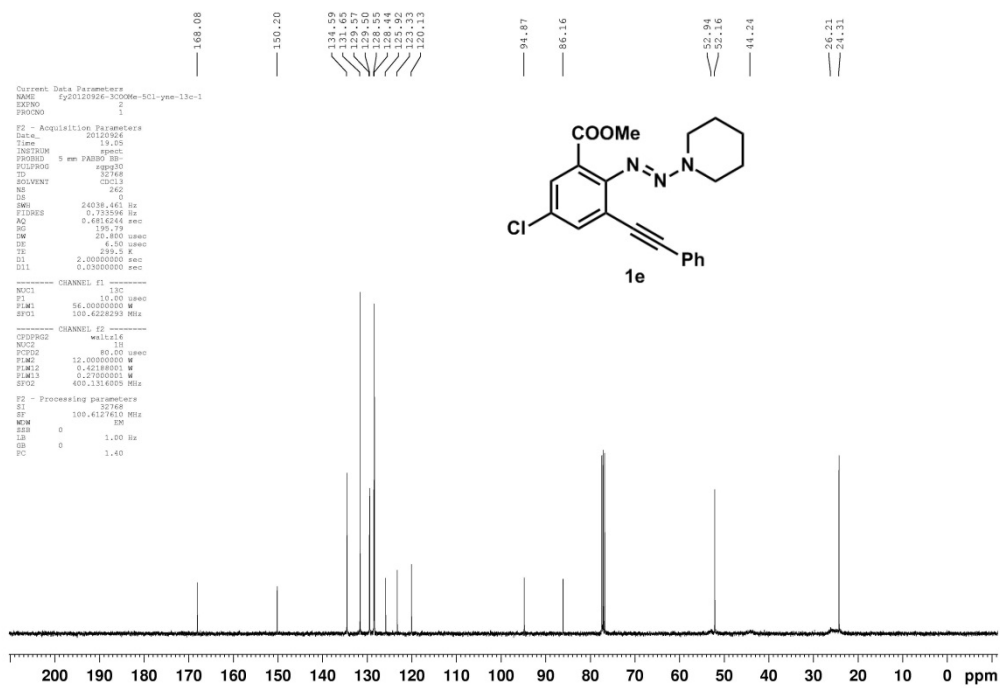

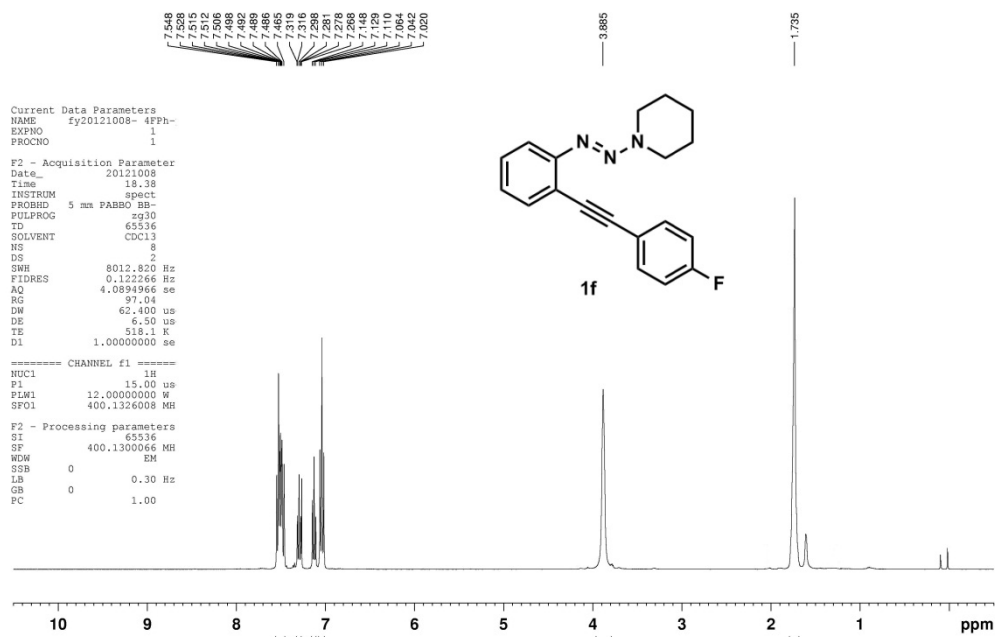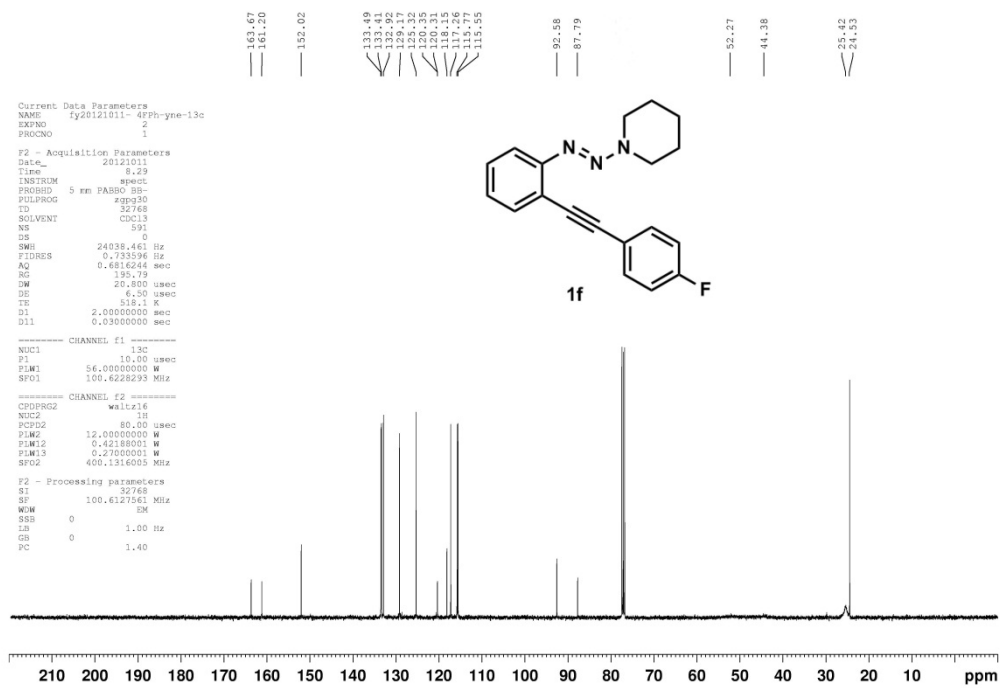



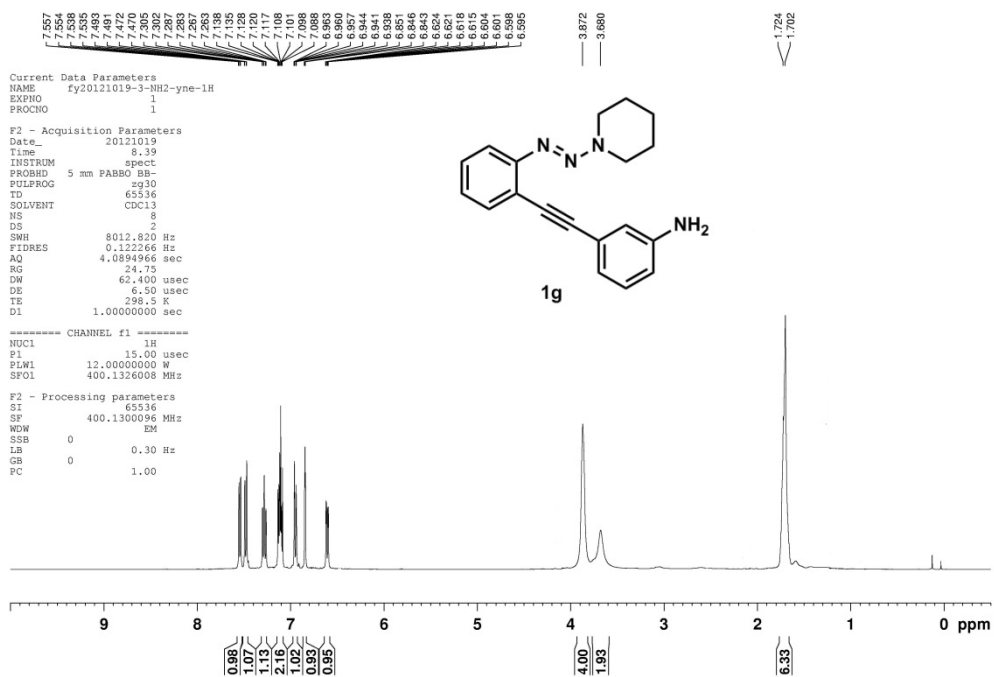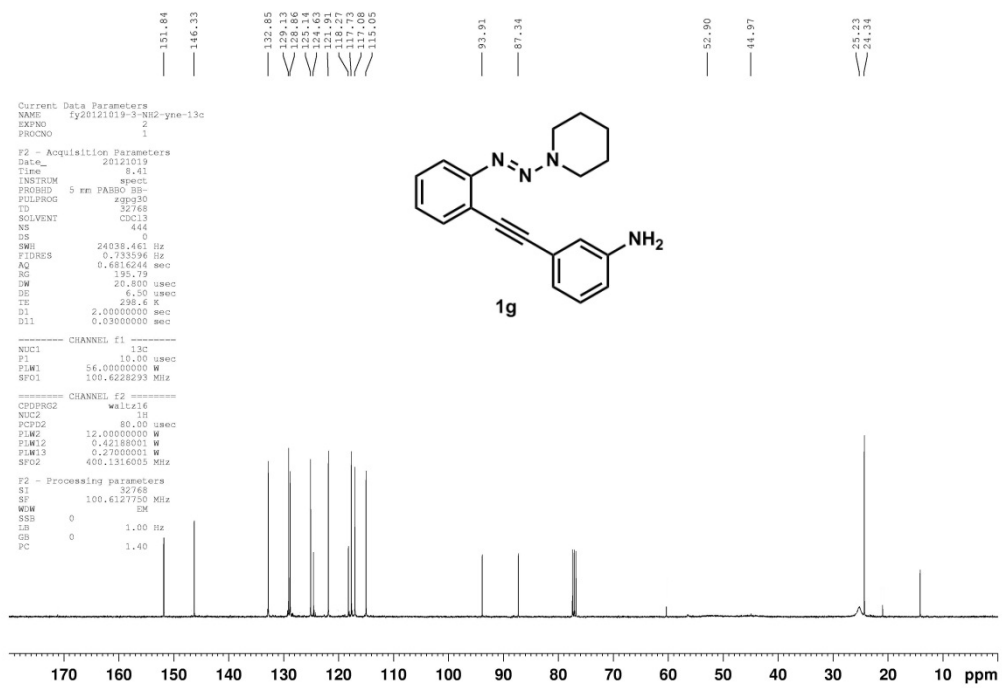



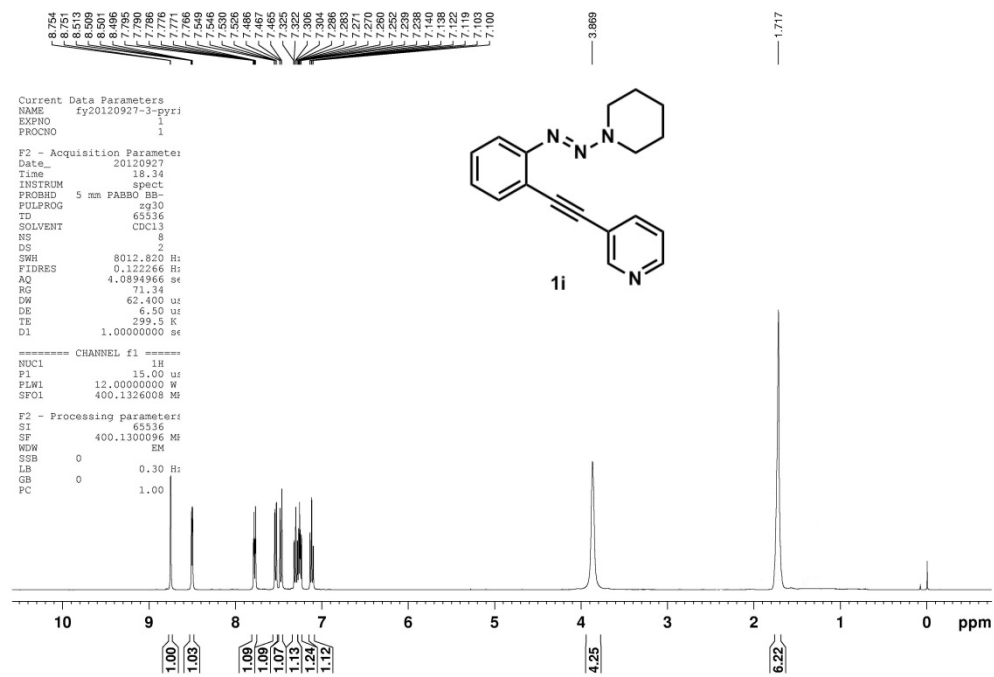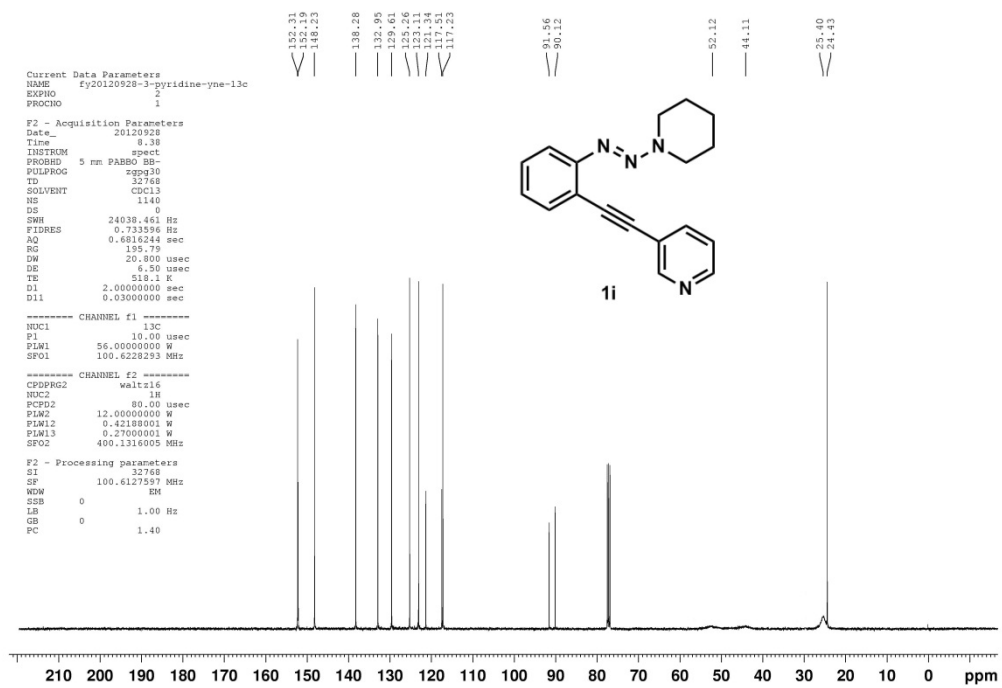

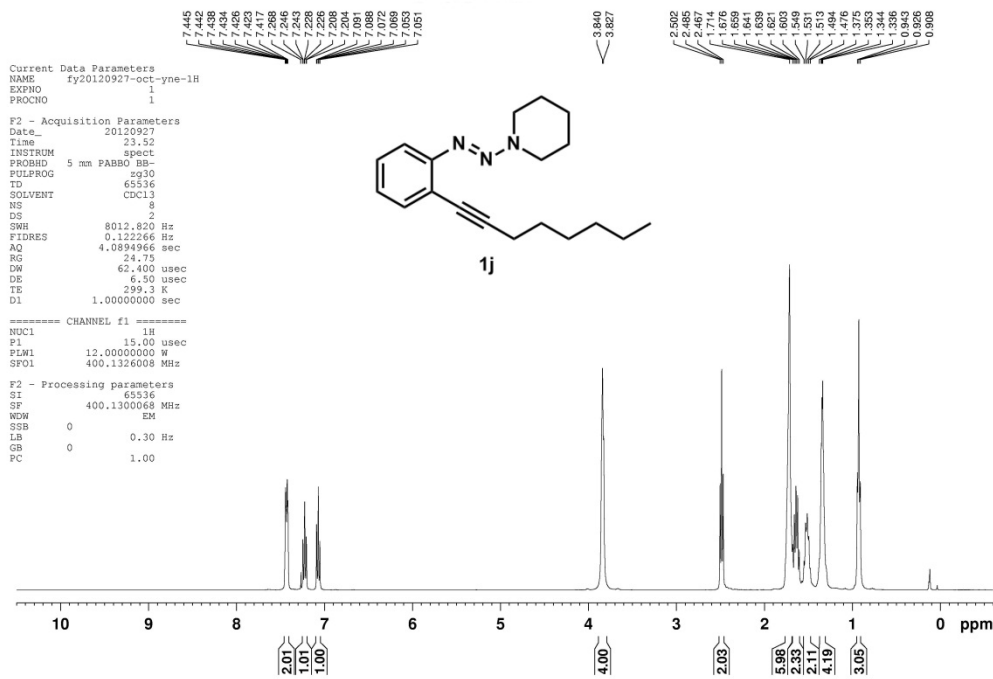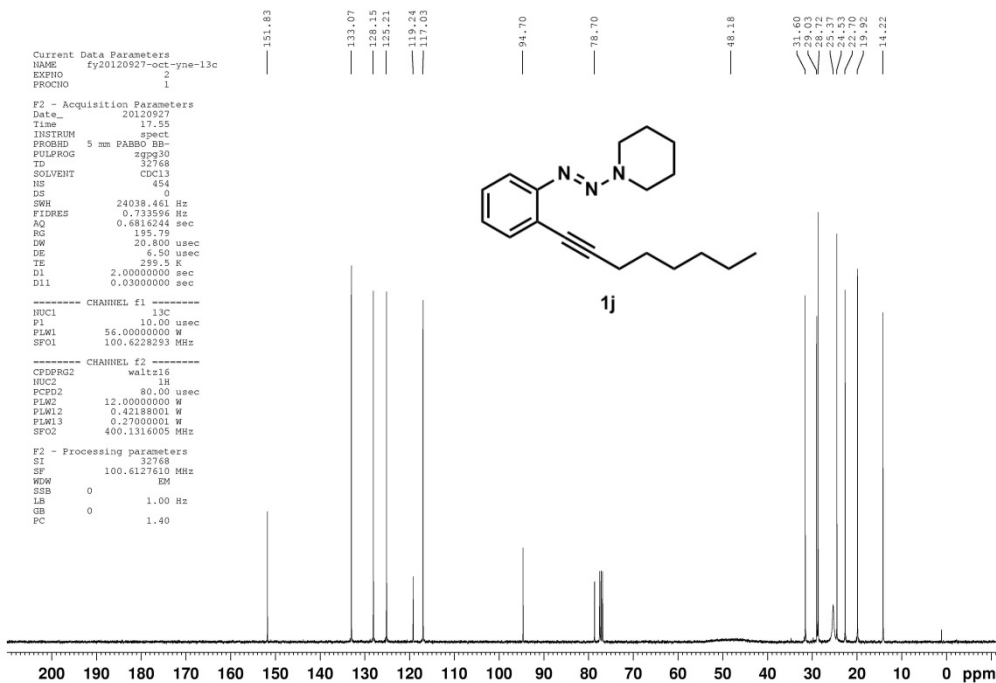

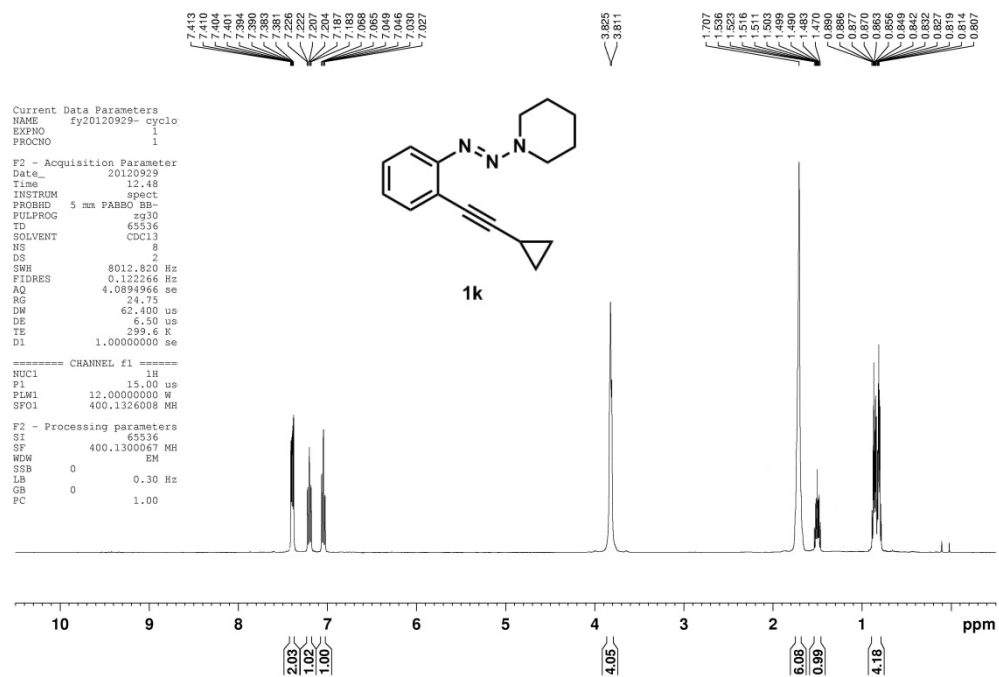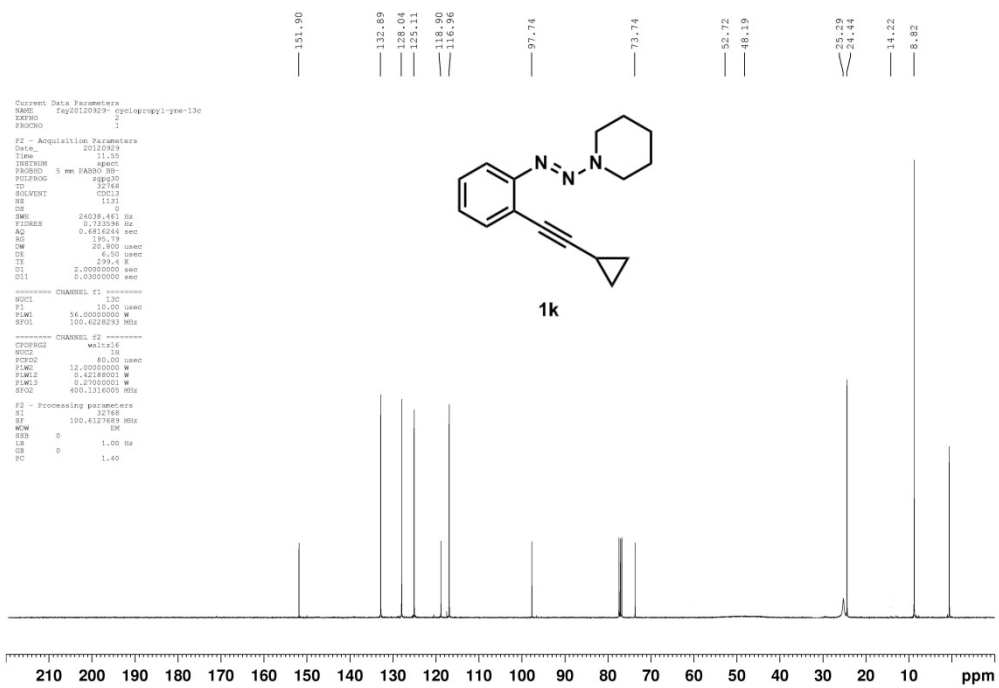

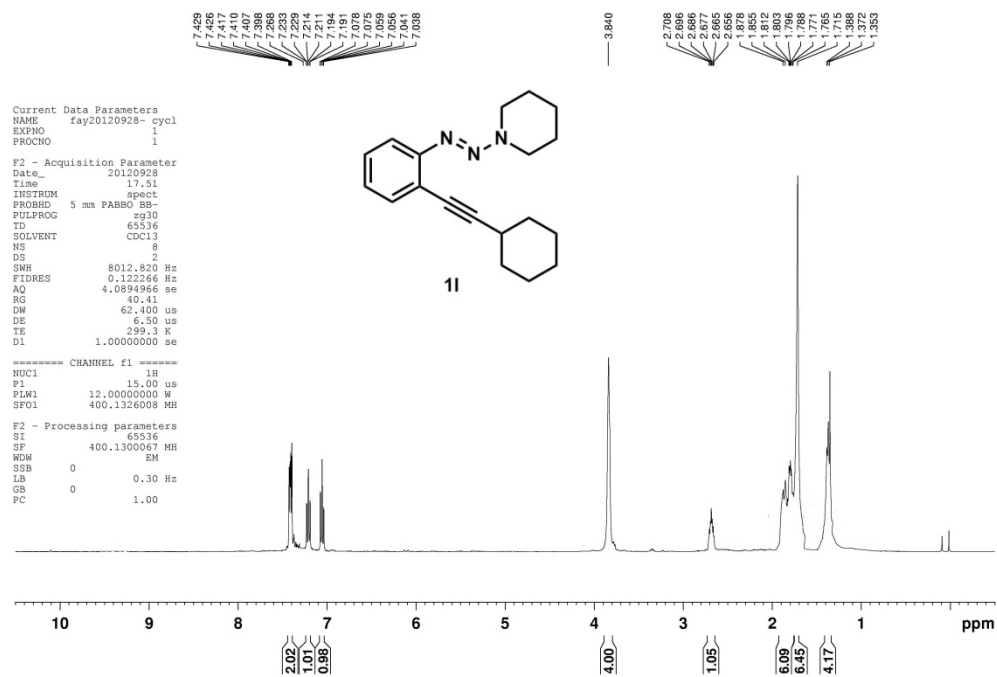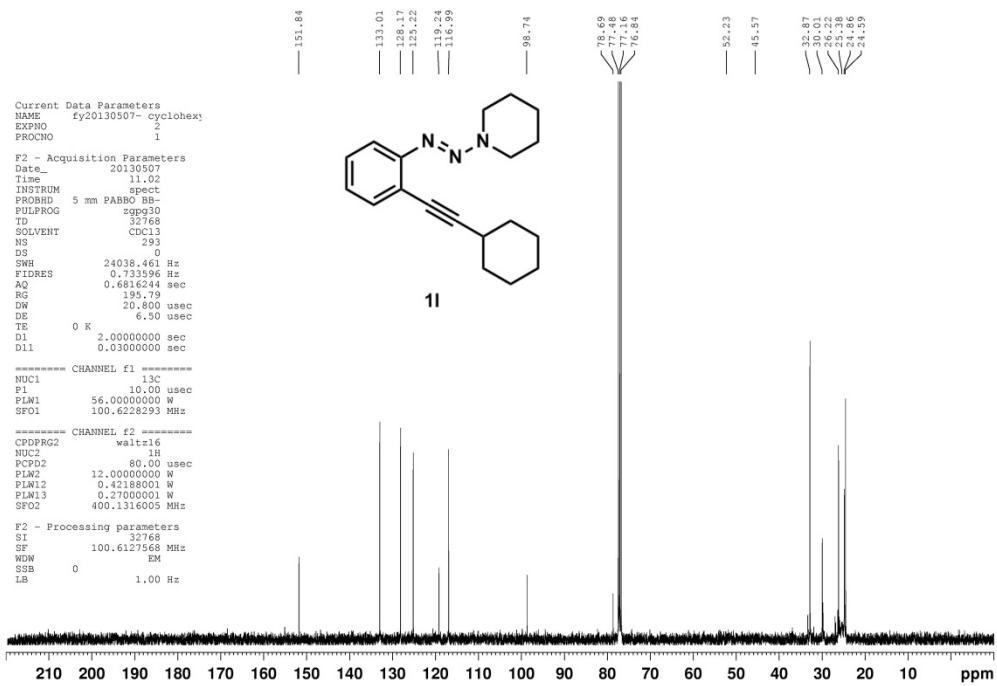



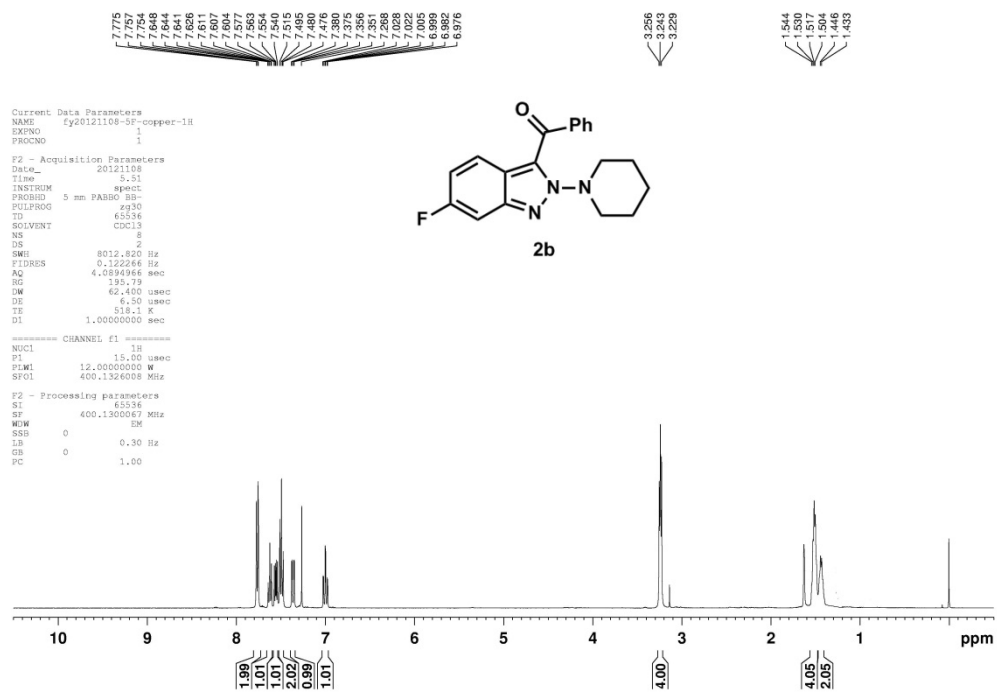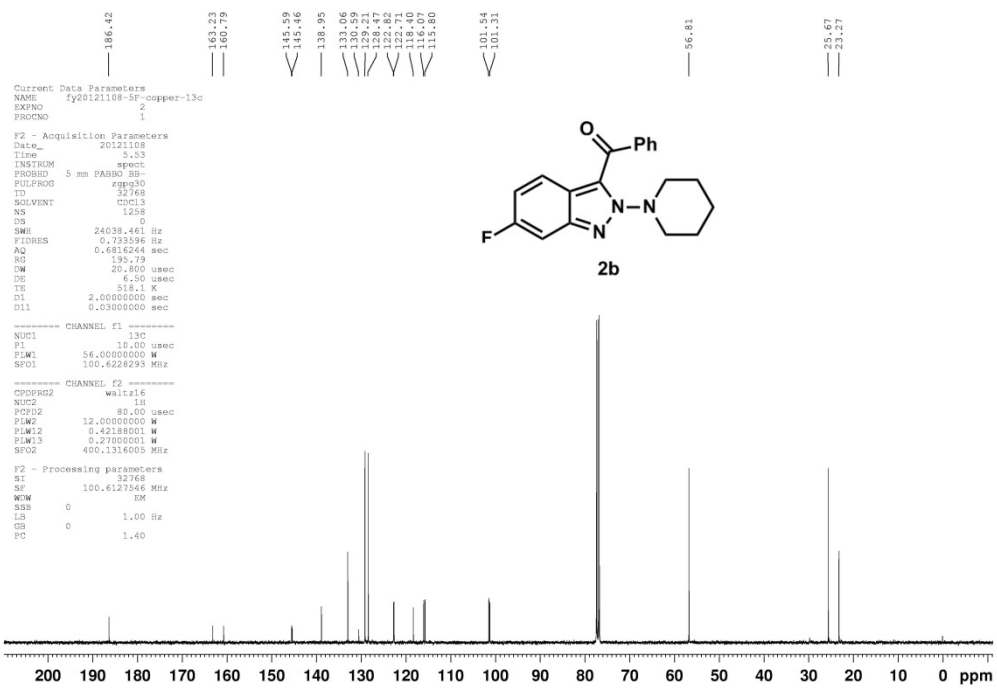



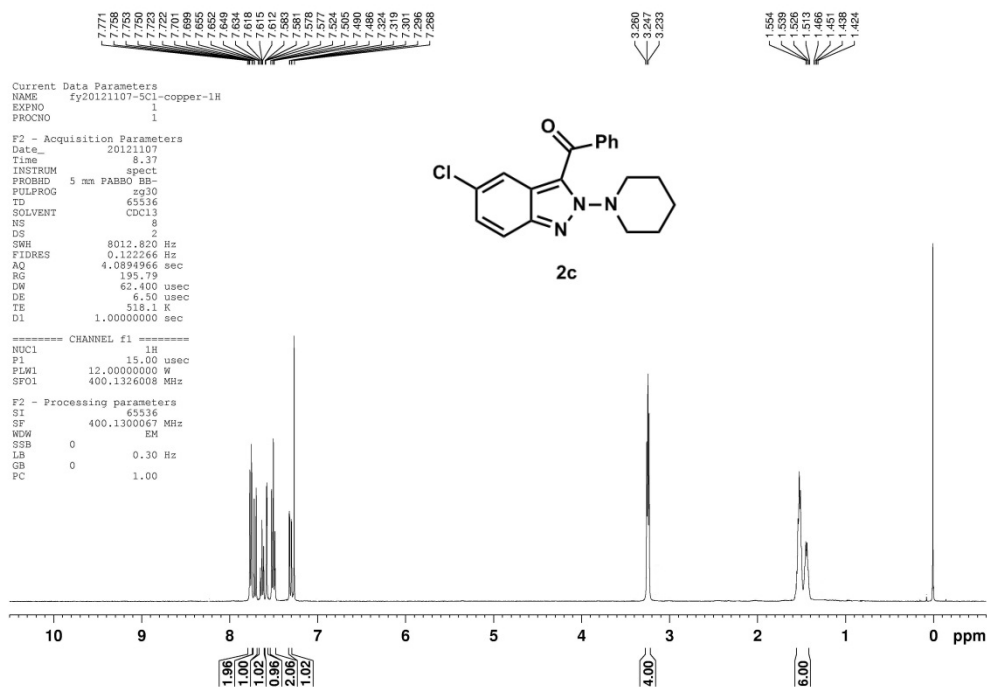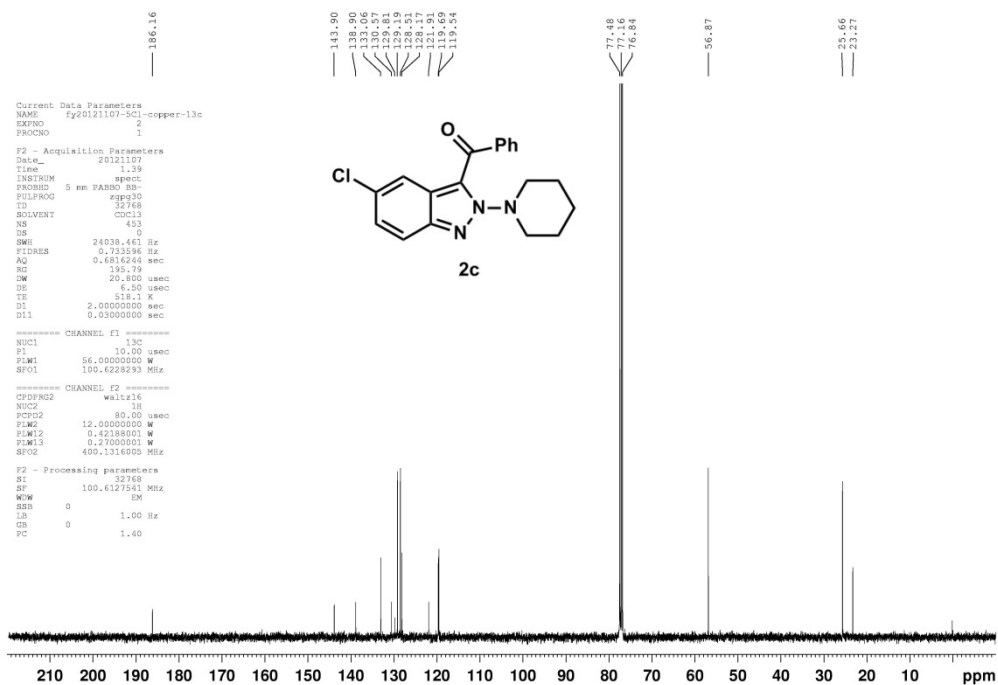



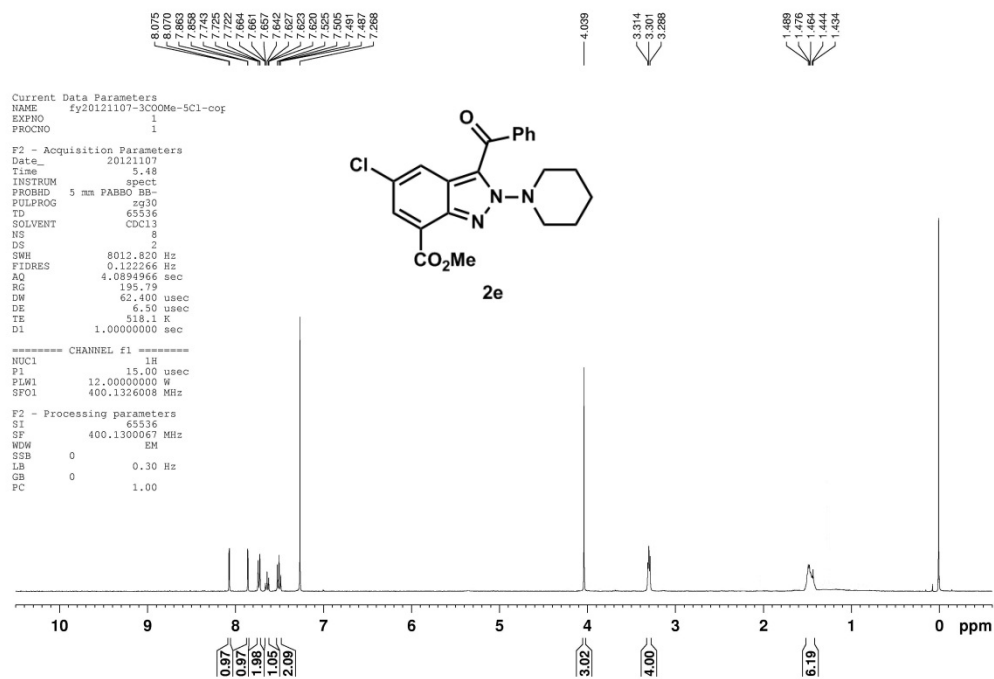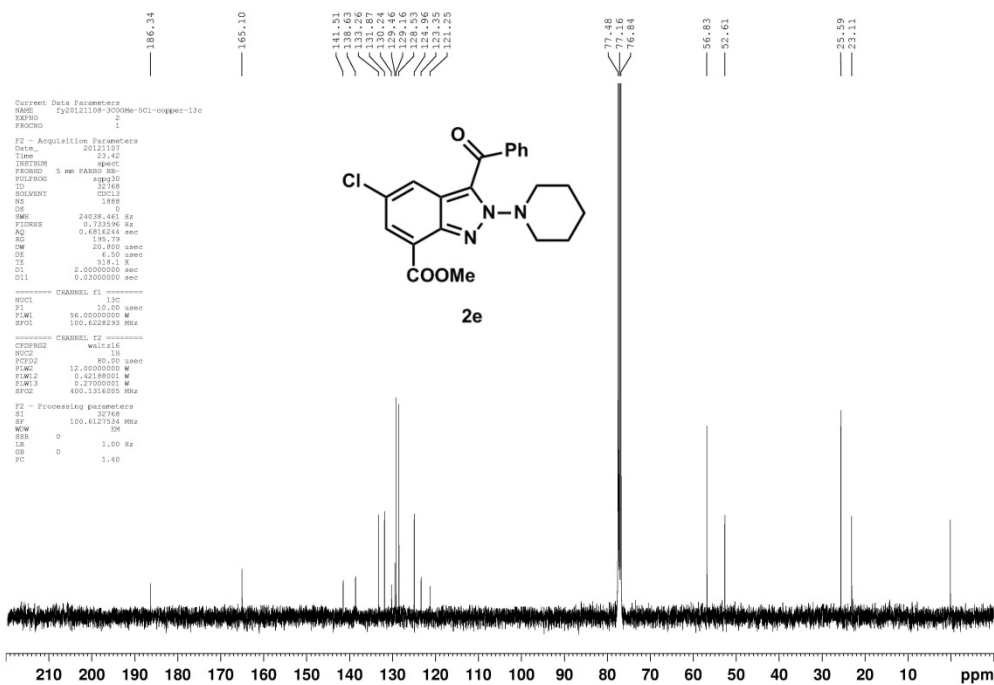

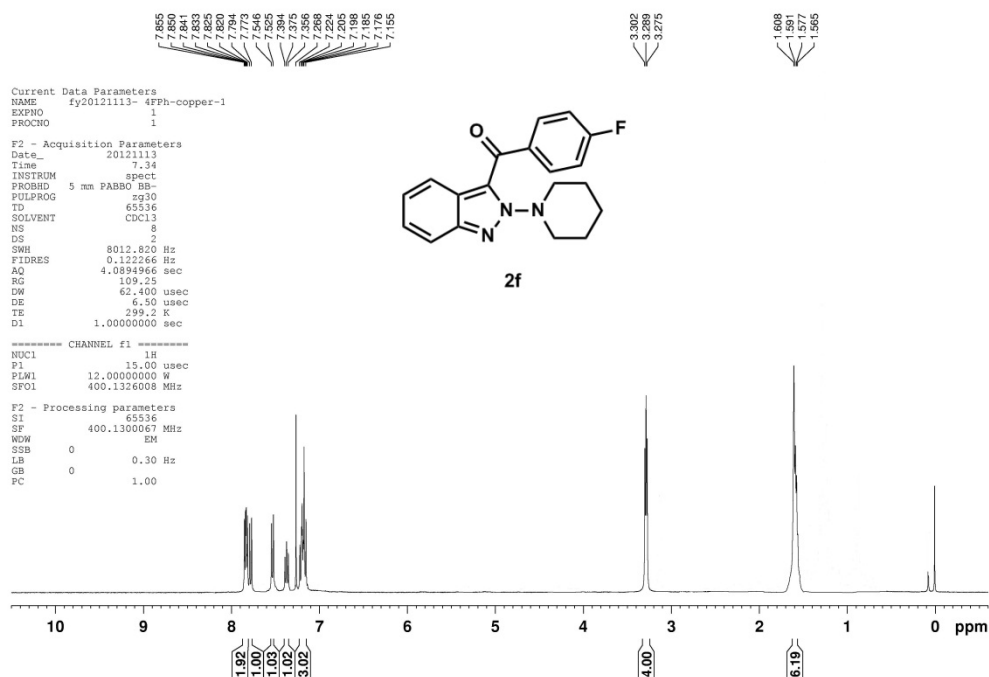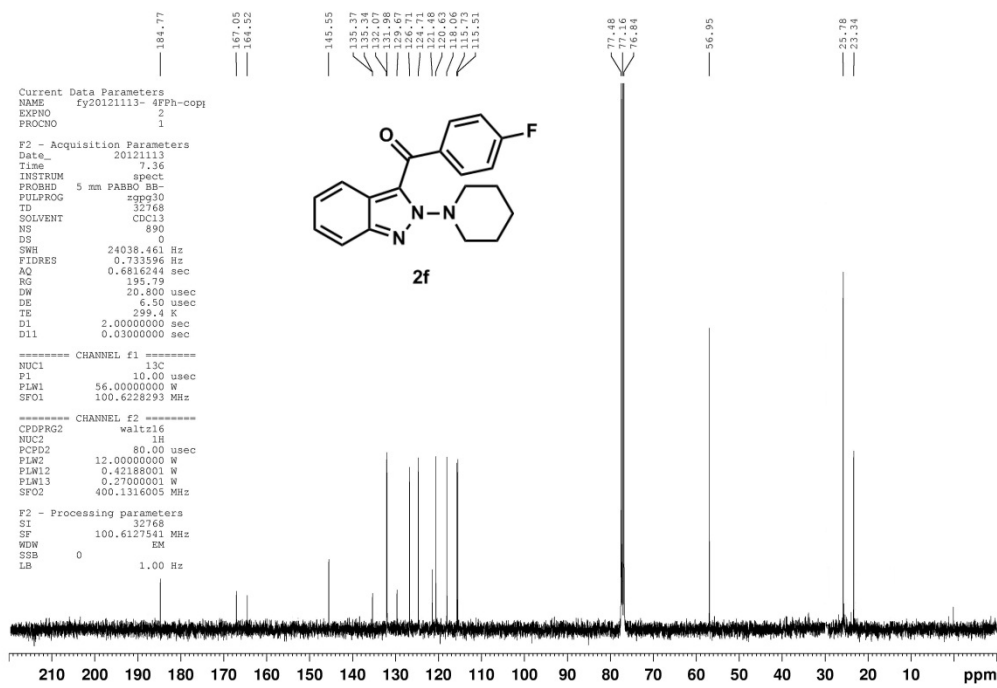

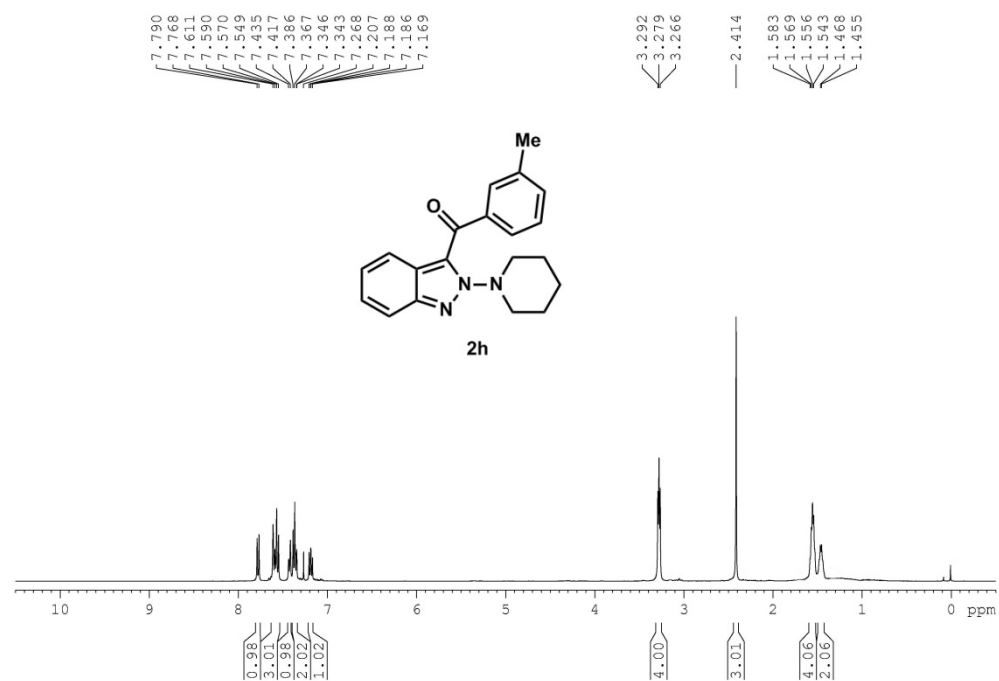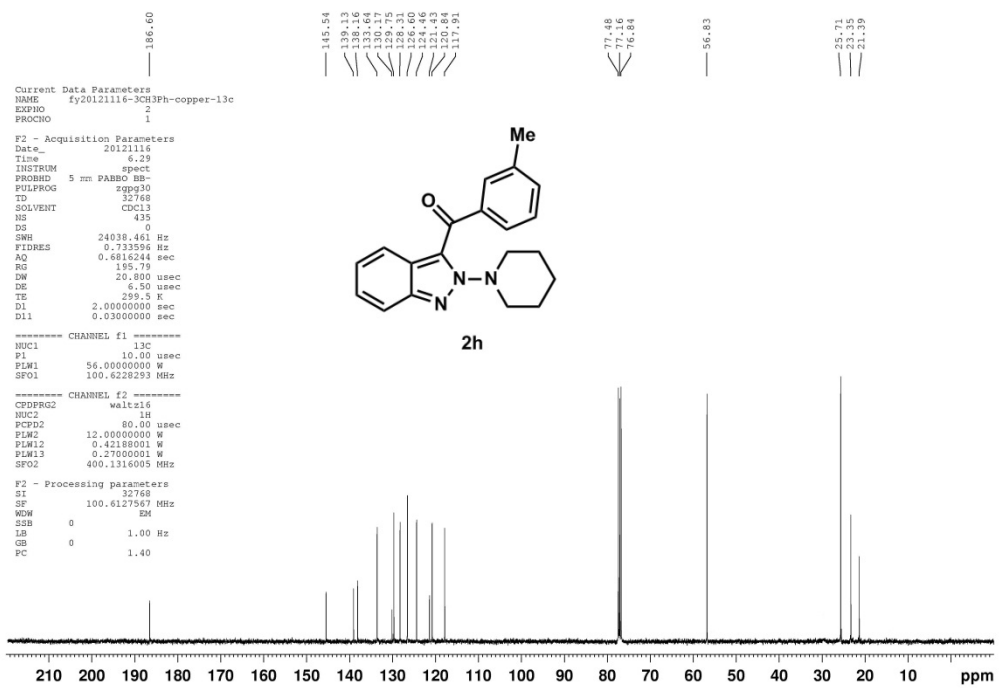

```

Current Data Parameters
NAME      2y0121116-3Ch3Ph-copper-13c
EXPNO    2
PROCNO   1

F2 - Acquisition Parameters
Date_    20121116
Time     6.29
INSTRUM  spect
PROBHD   5 mm PABBO BB-
PULPROG  zgpg30
TD        32768
SOLVENT  CDCl3
NS        435
DS        0
SWH       24038.461 Hz
FIDRES    0.733596 Hz
AQ        0.4816244 sec
RG        195.79
DW        20.800 usec
DE        6.50 usec
TE        299.5 K
D1        2.00000000 sec
D11       0.03000000 sec

===== CHANNEL f1 =====
NUC1      13C
P1        10.00 usec
PLM1     56.00000000 W
SFO1     100.6228293 MHz

===== CHANNEL f2 =====
CPDPRG2  waltz16
NUC2      1H
PCPD2     80.00 usec
PLM2     12.00000000 W
PLM12    0.42188001 W
PLM13    0.27000031 W
SFO2     400.1316095 MHz

F2 - Processing parameters
SI        32768
SF        100.6127967 MHz
WDW       EM
SSB       0
GB        0
PC        1.40
    
```

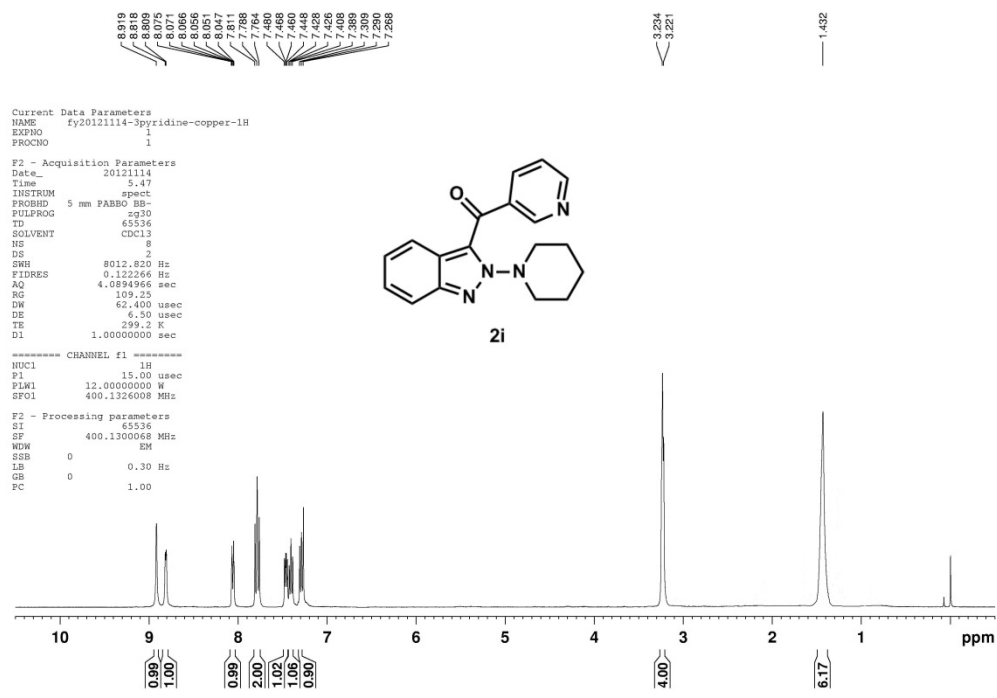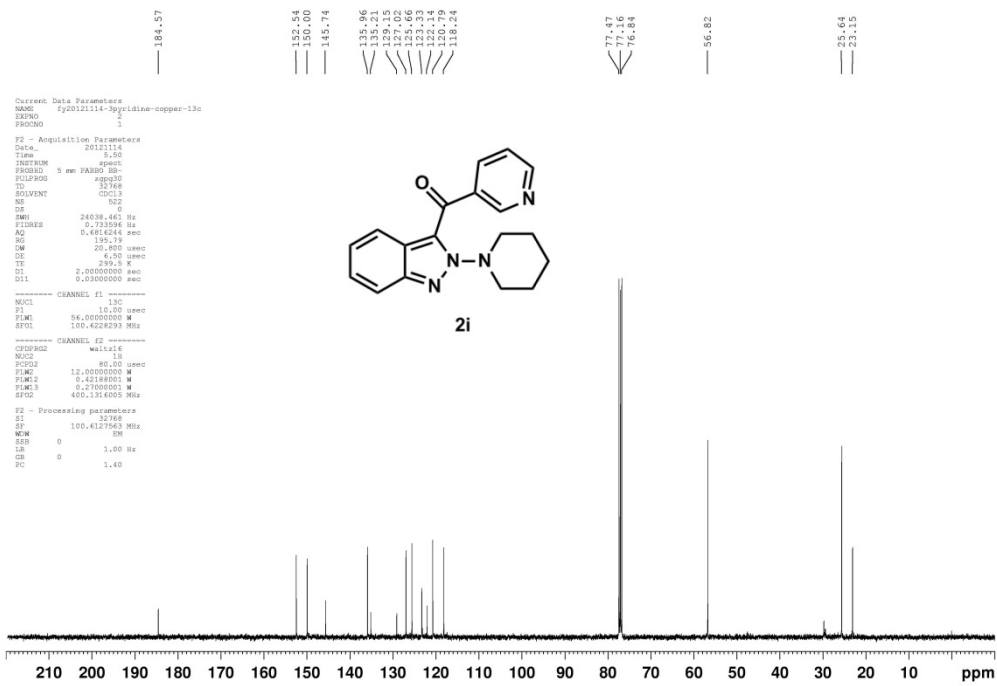



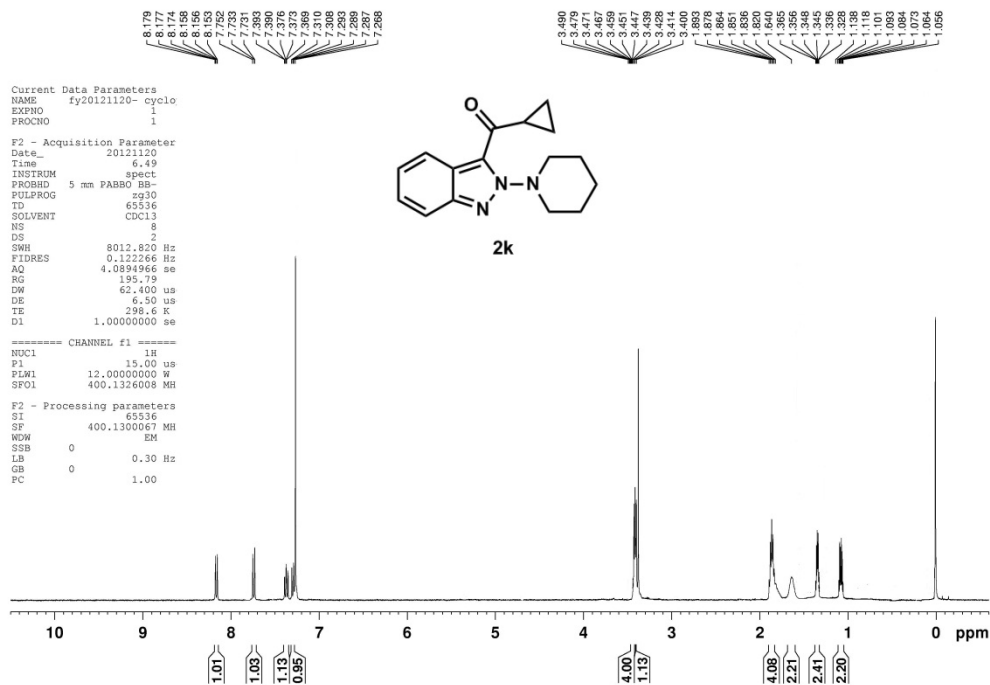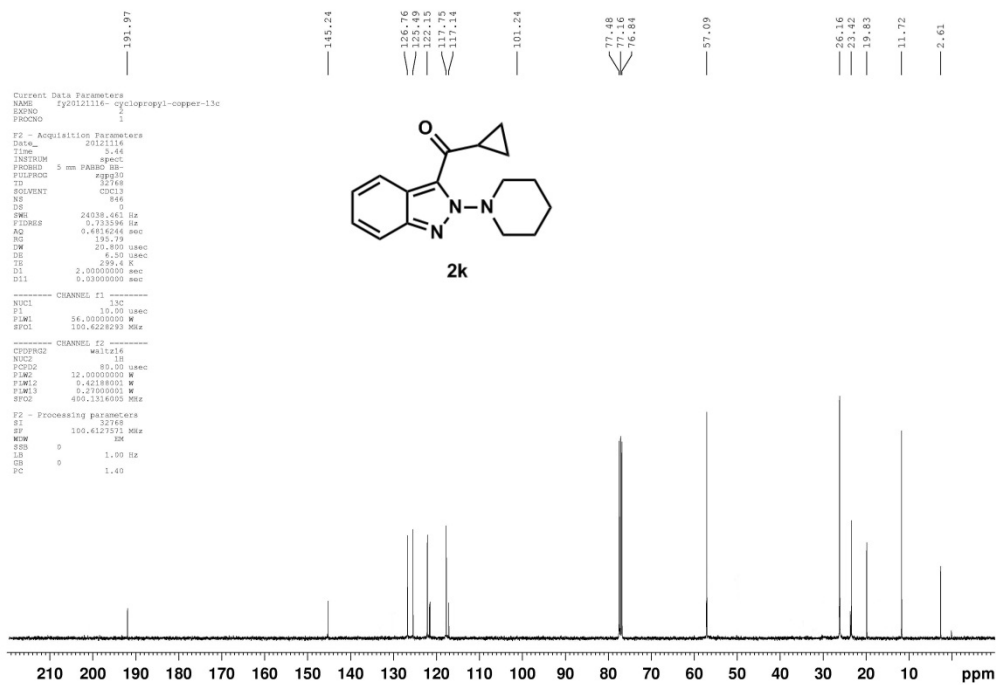



6.882  
7.784  
7.686  
7.673  
7.656  
7.647  
7.473  
7.458  
7.429  
7.427  
7.409  
7.386  
7.367  
7.354  
7.338  
7.323  
7.320  
7.317  
7.298  
7.226  
7.211  
7.191  
7.188  
7.154  
7.132  
7.117  
7.115  
6.848  
6.843

0.014

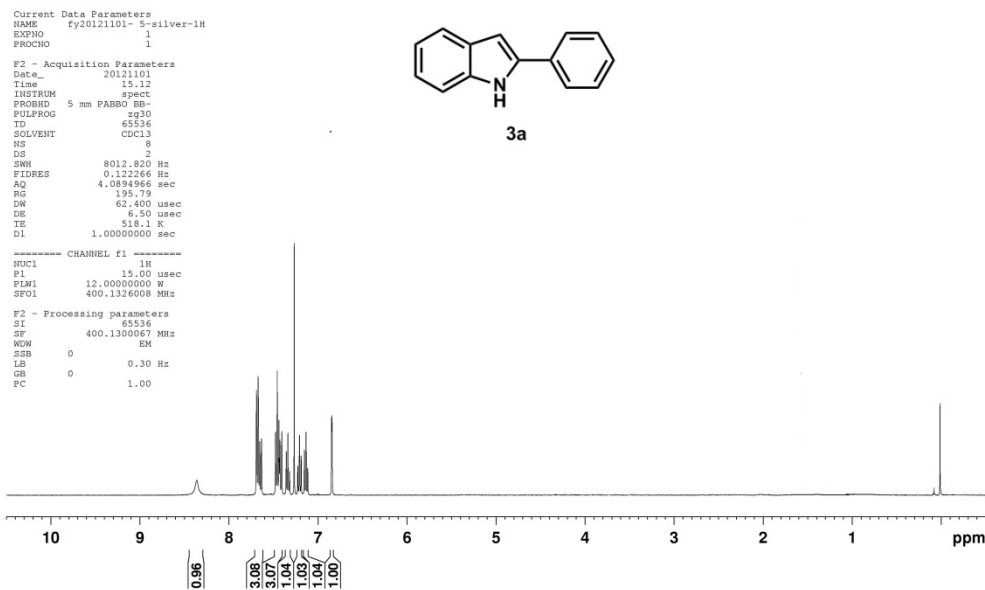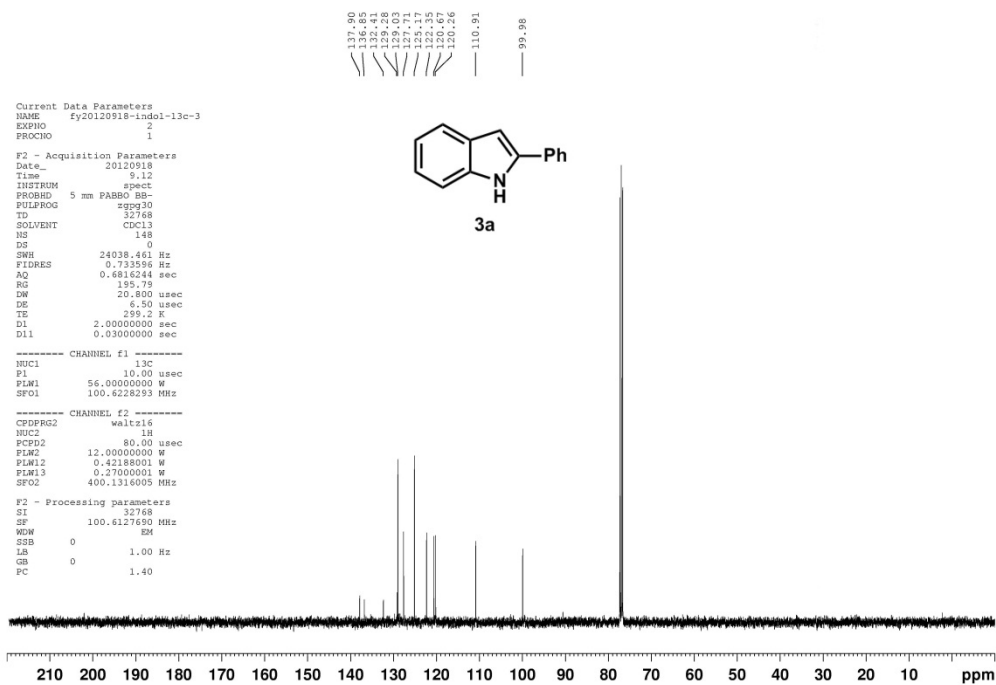

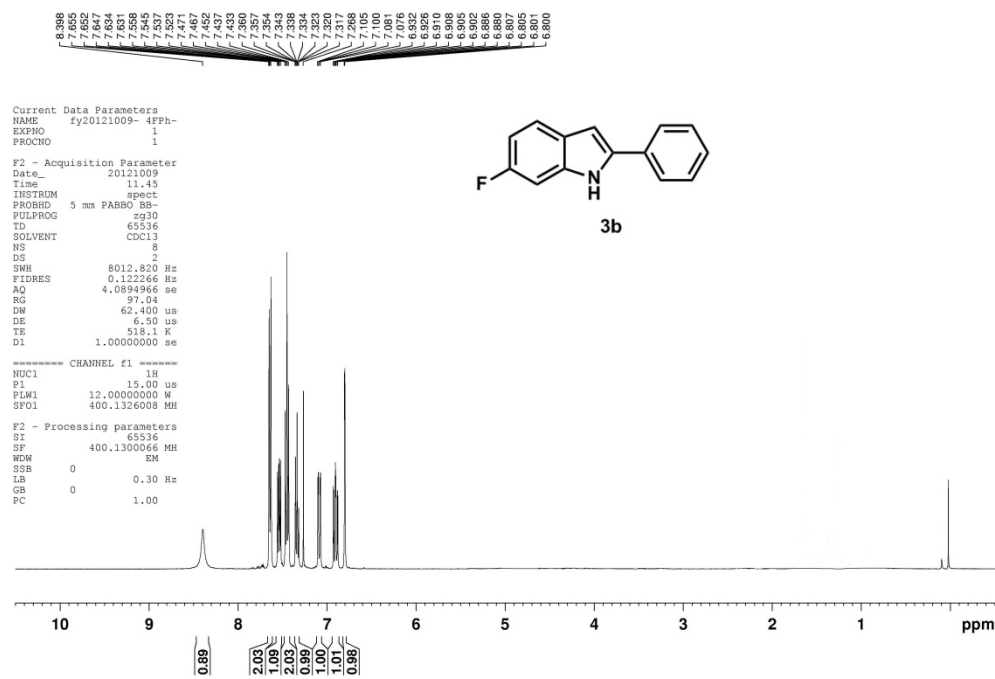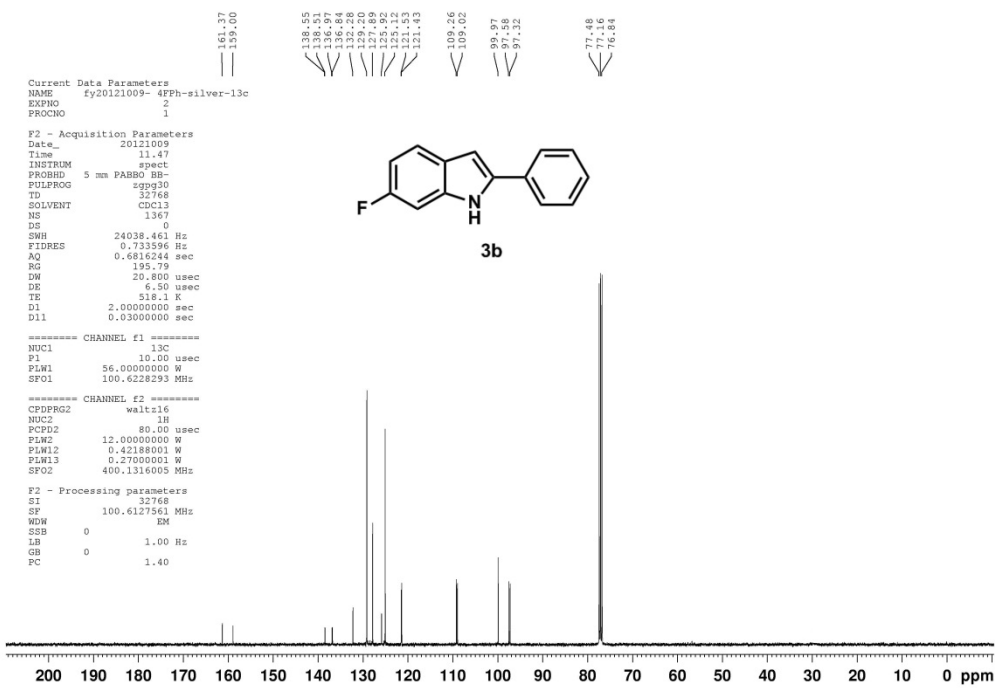



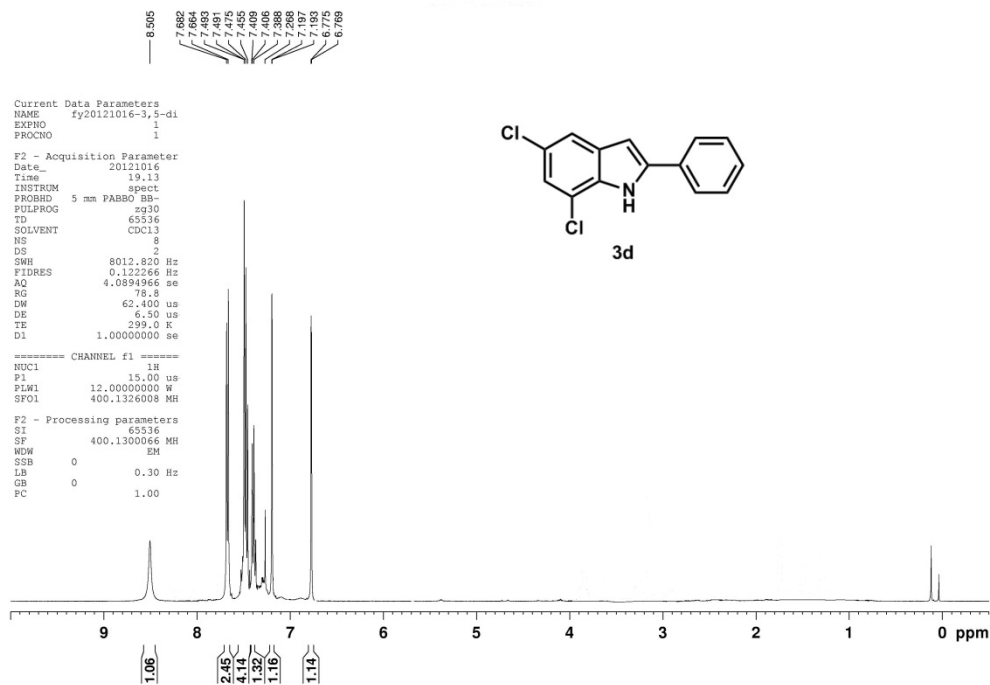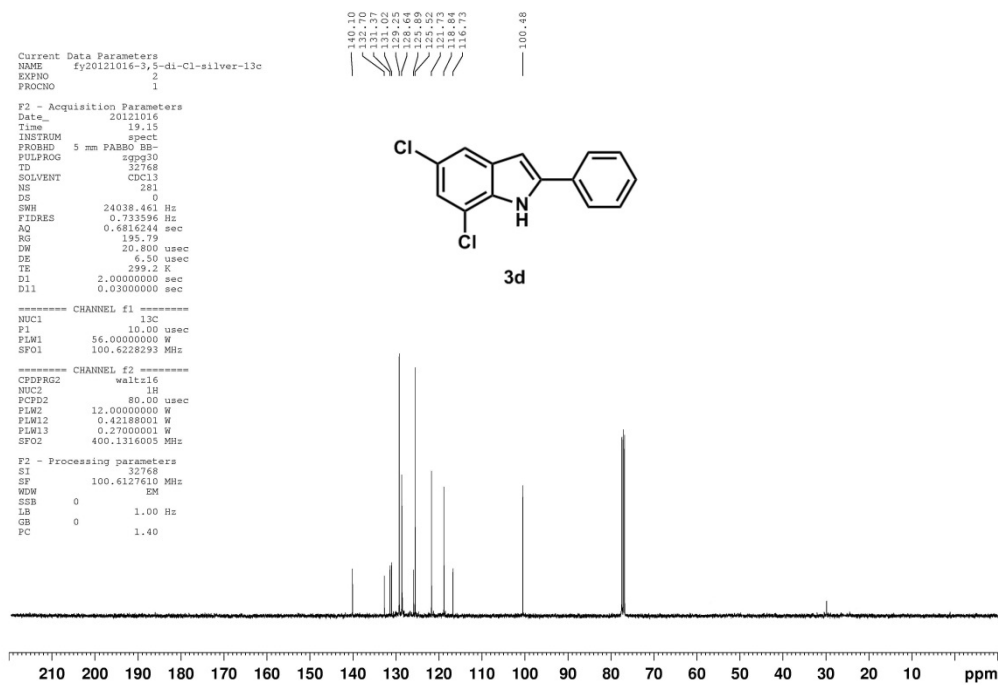

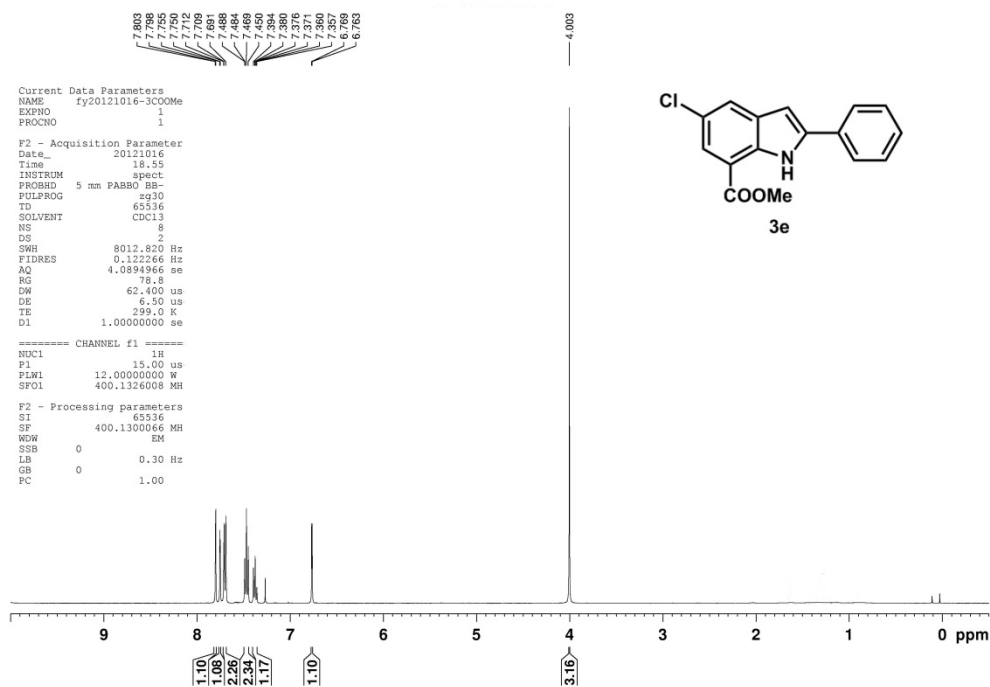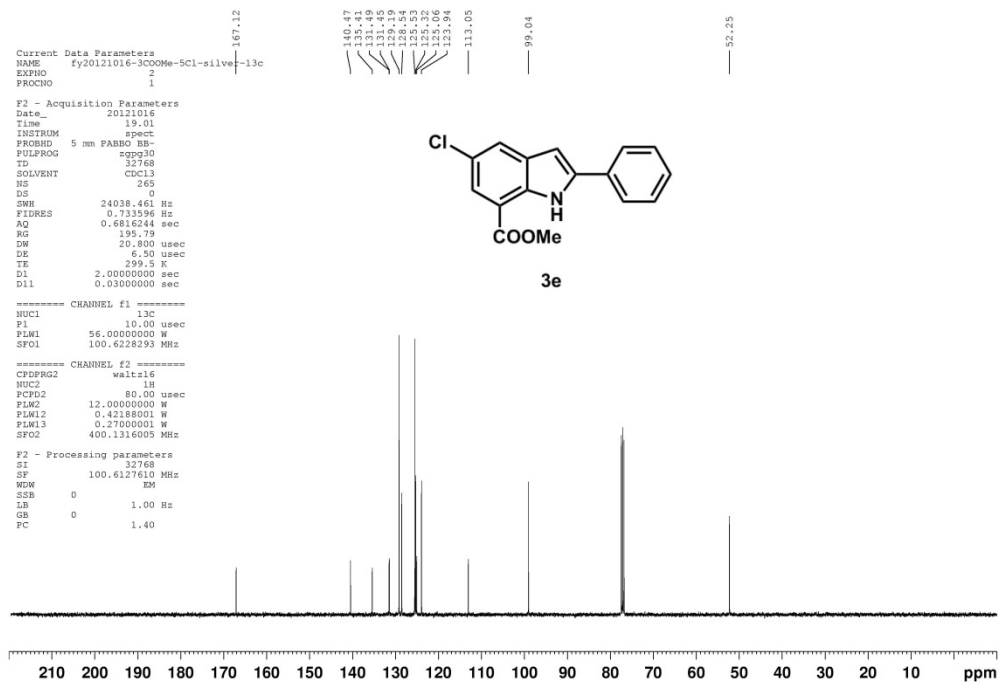

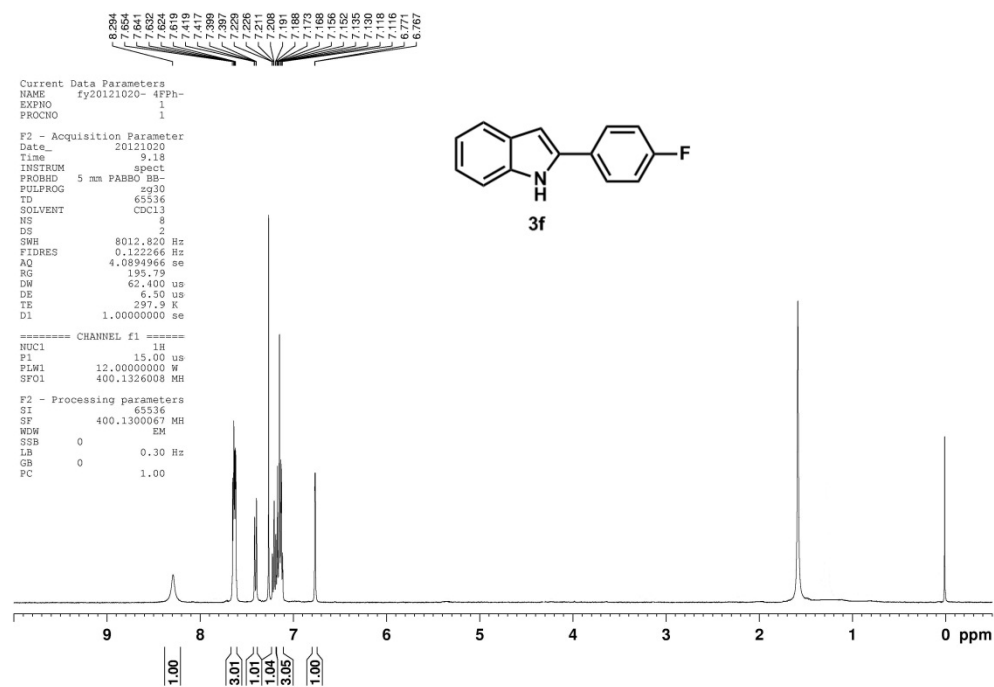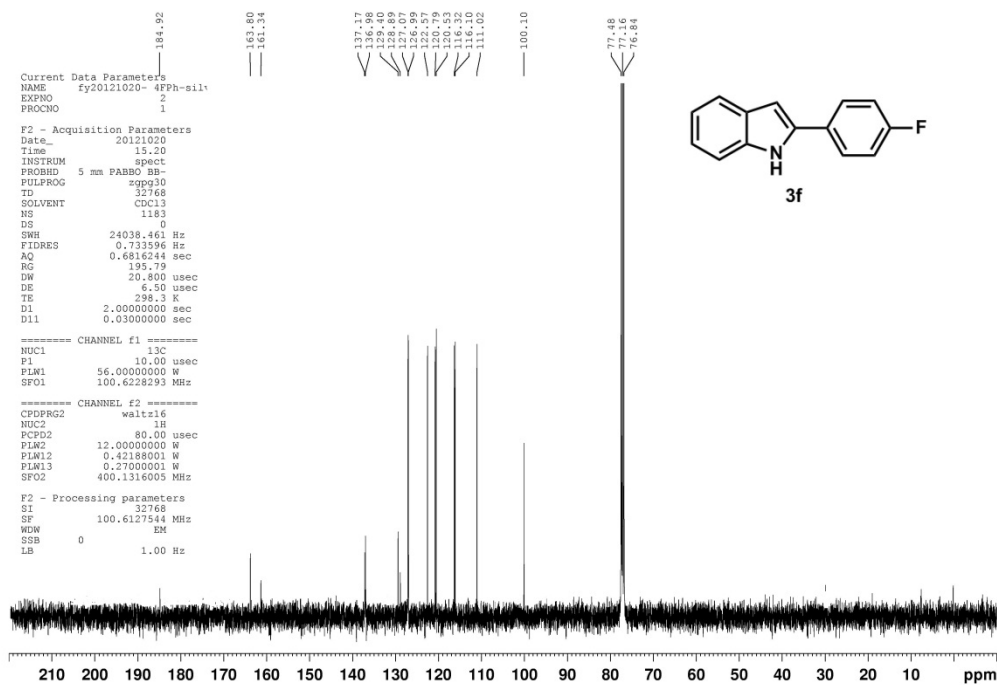

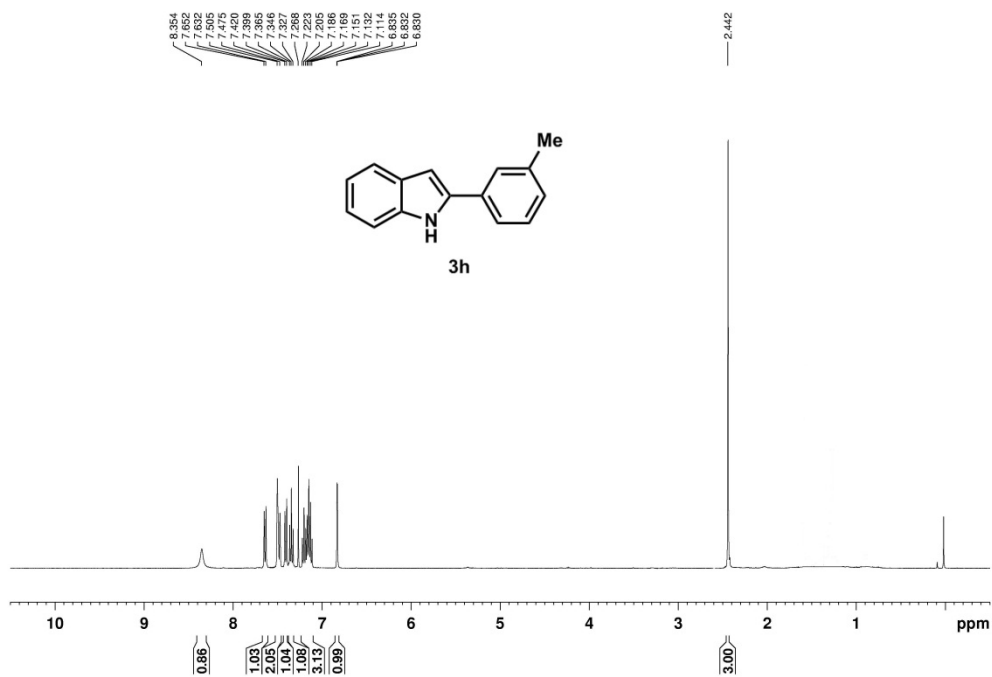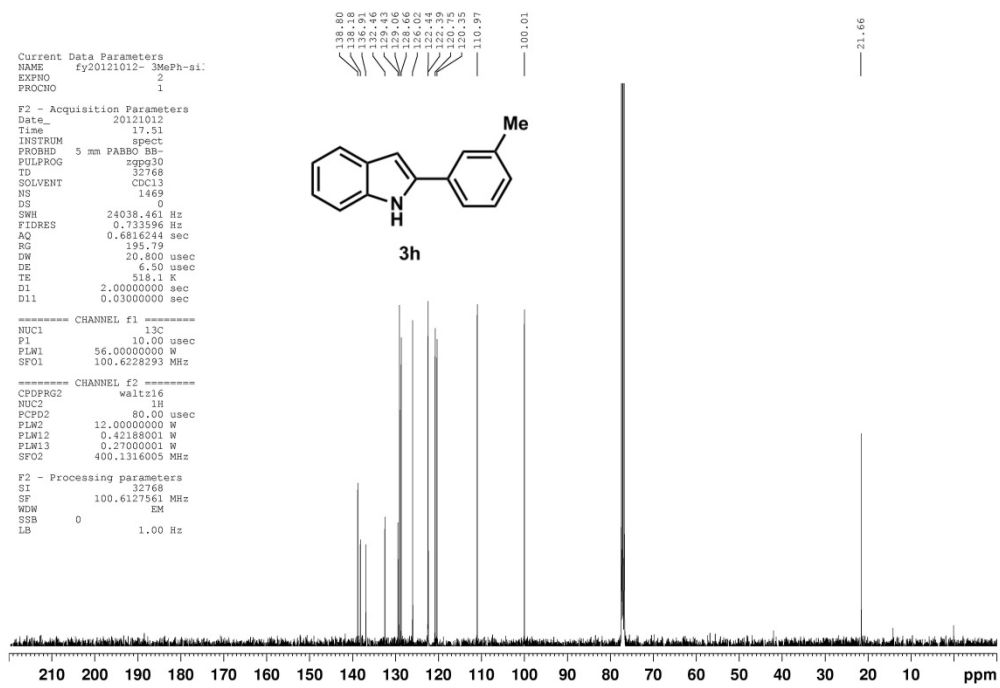

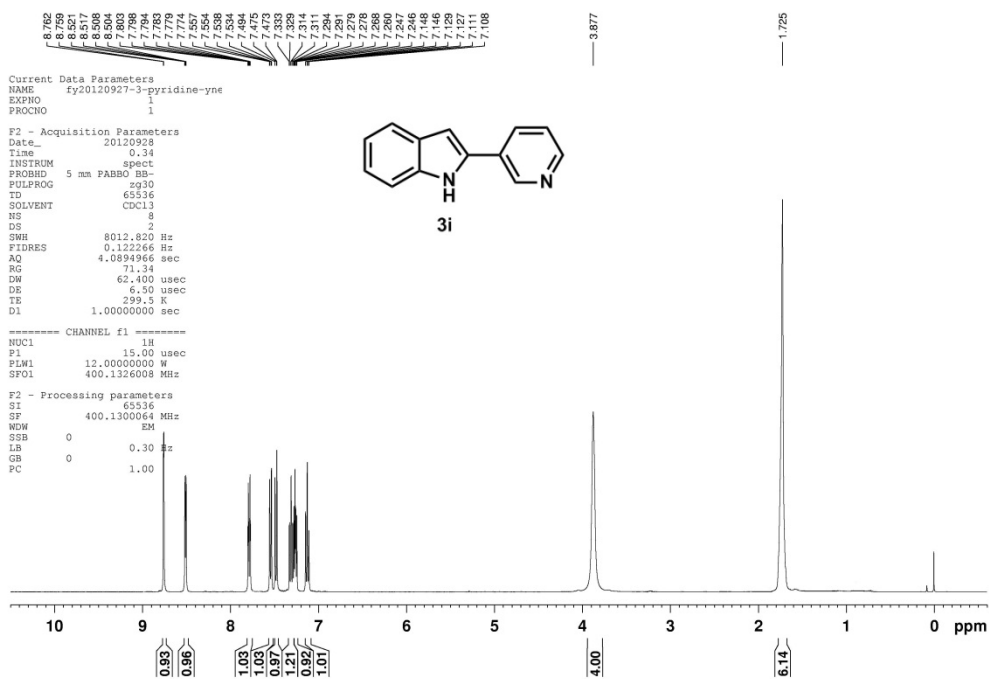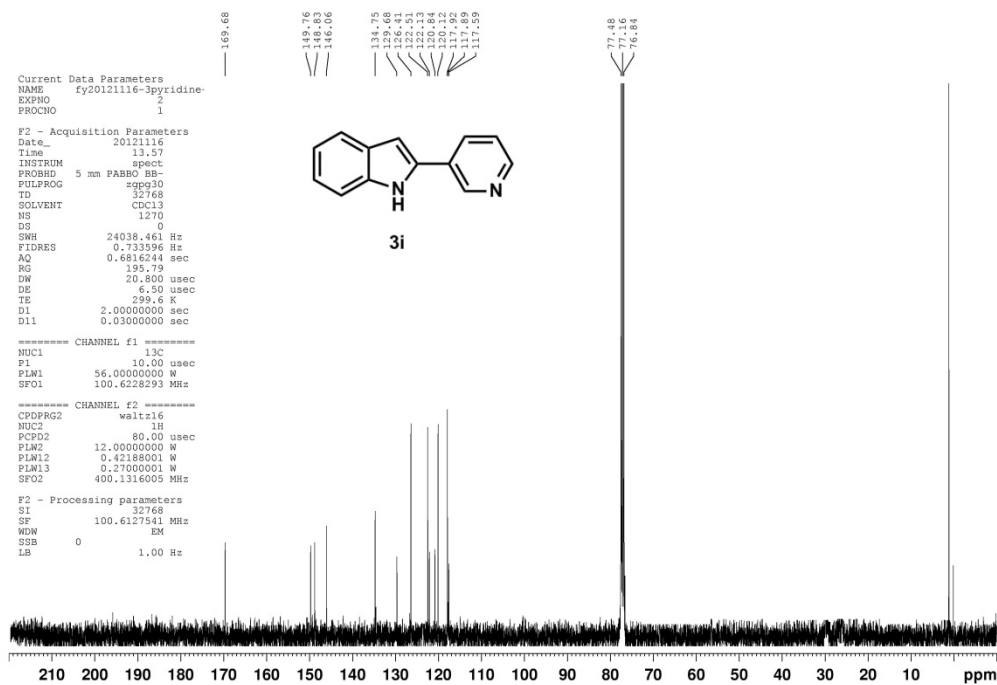



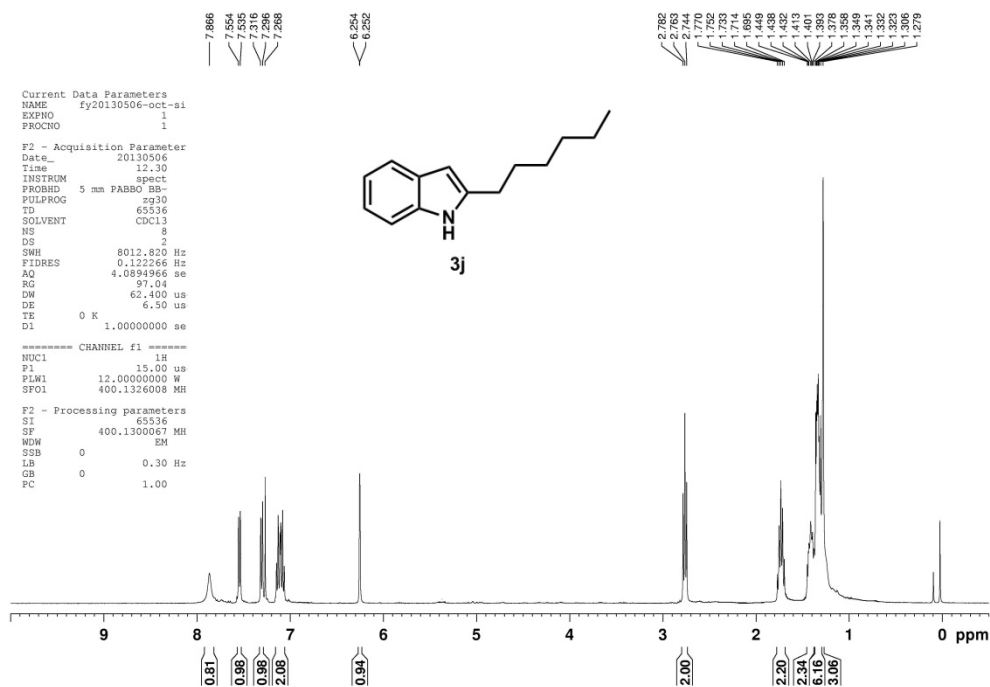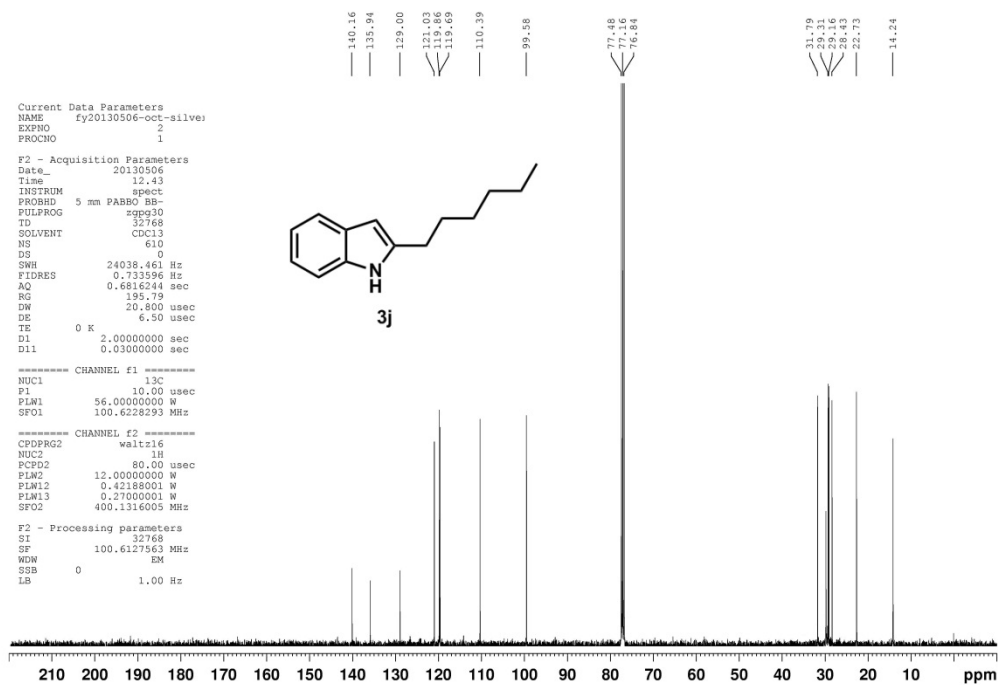

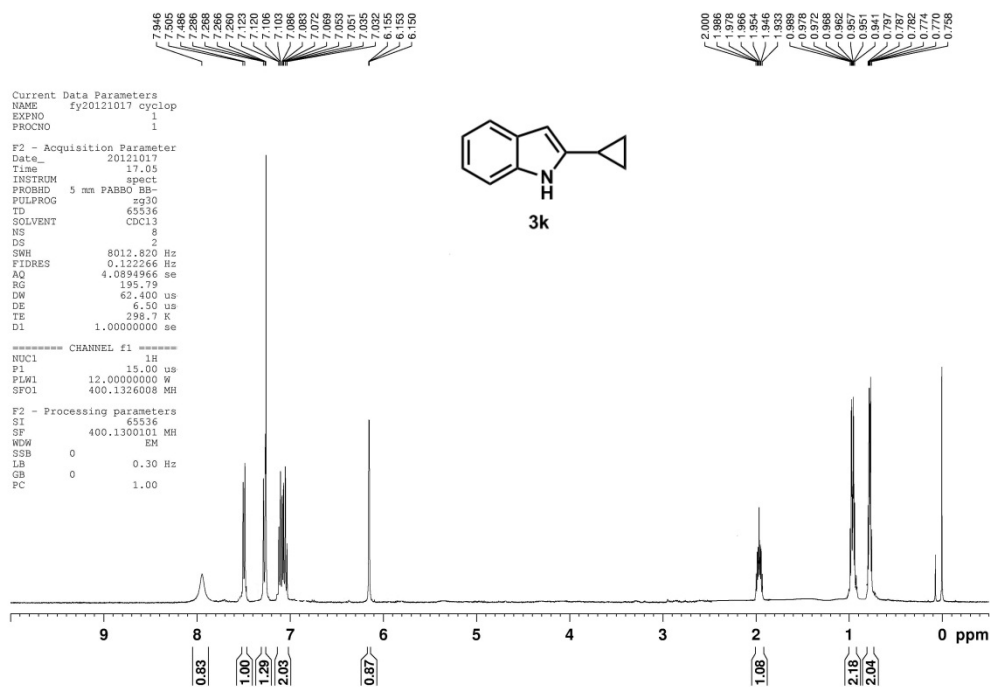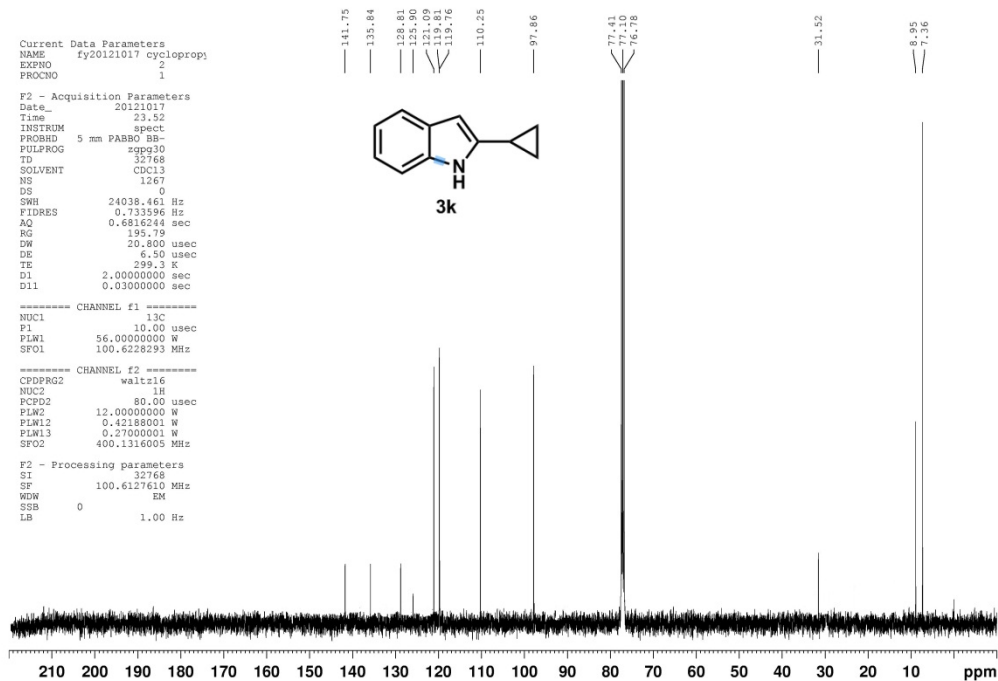

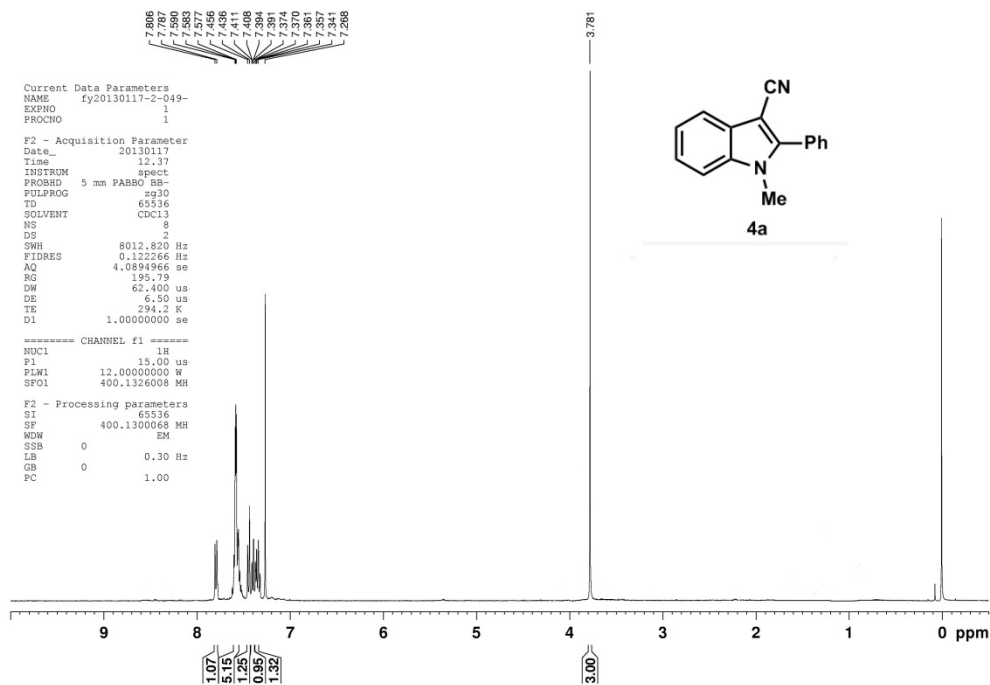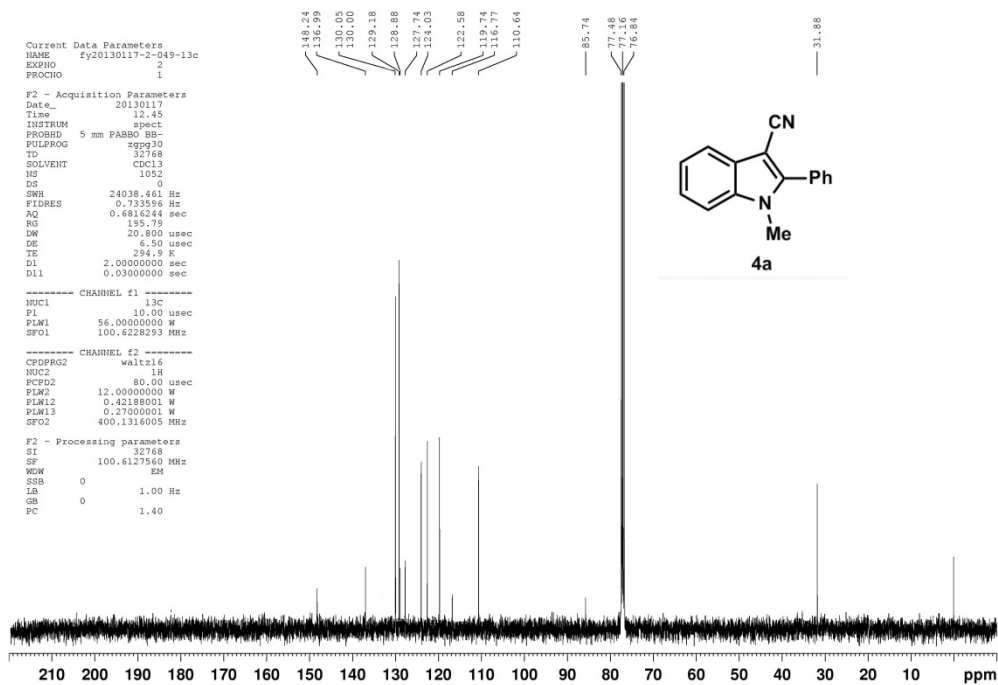

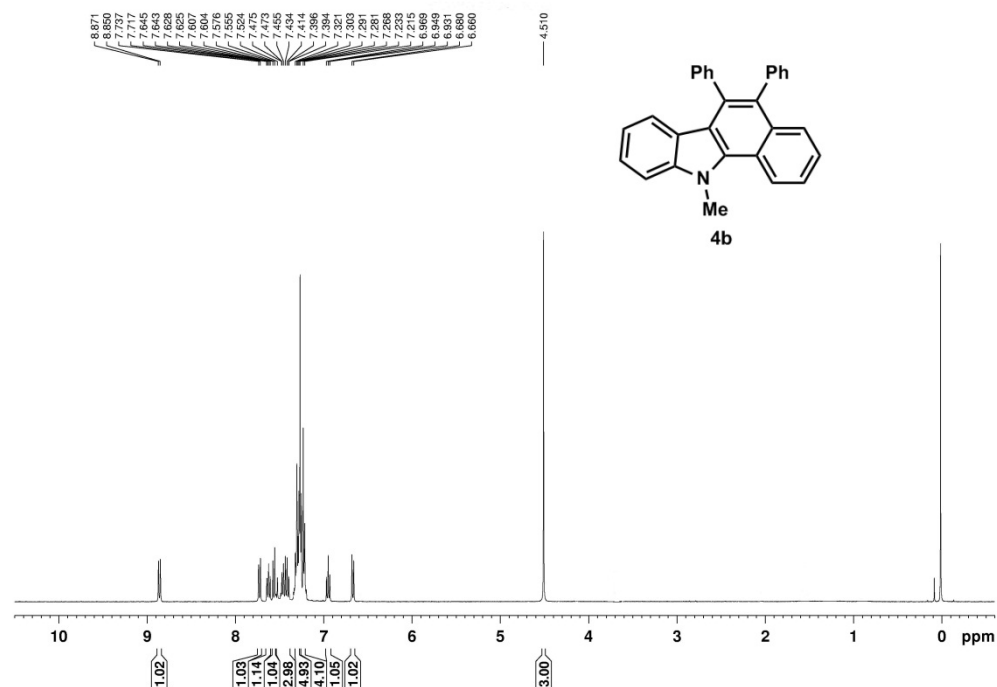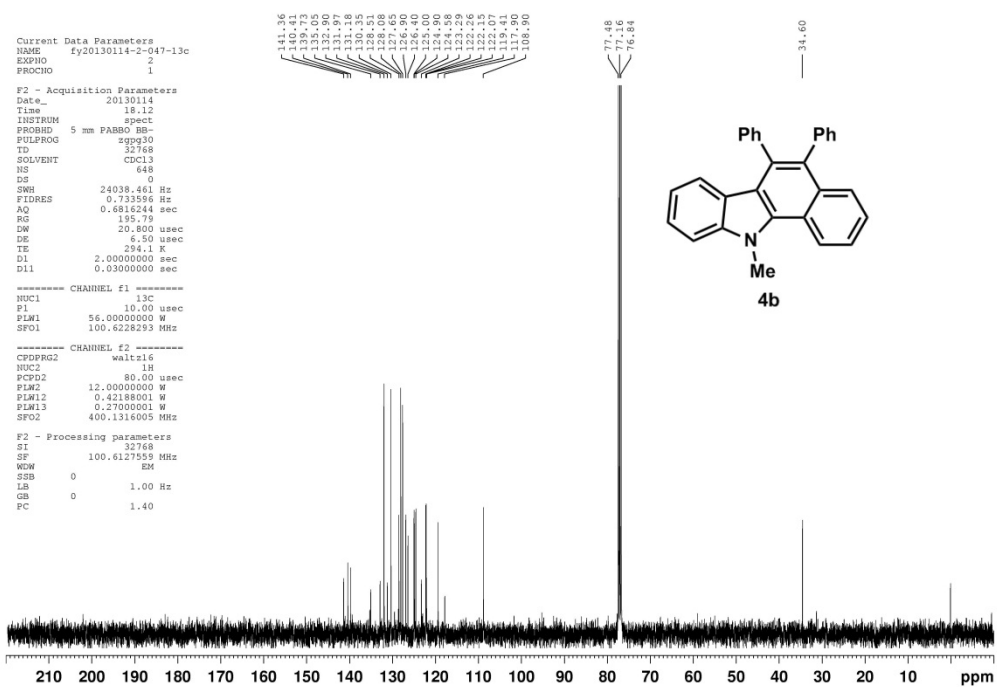

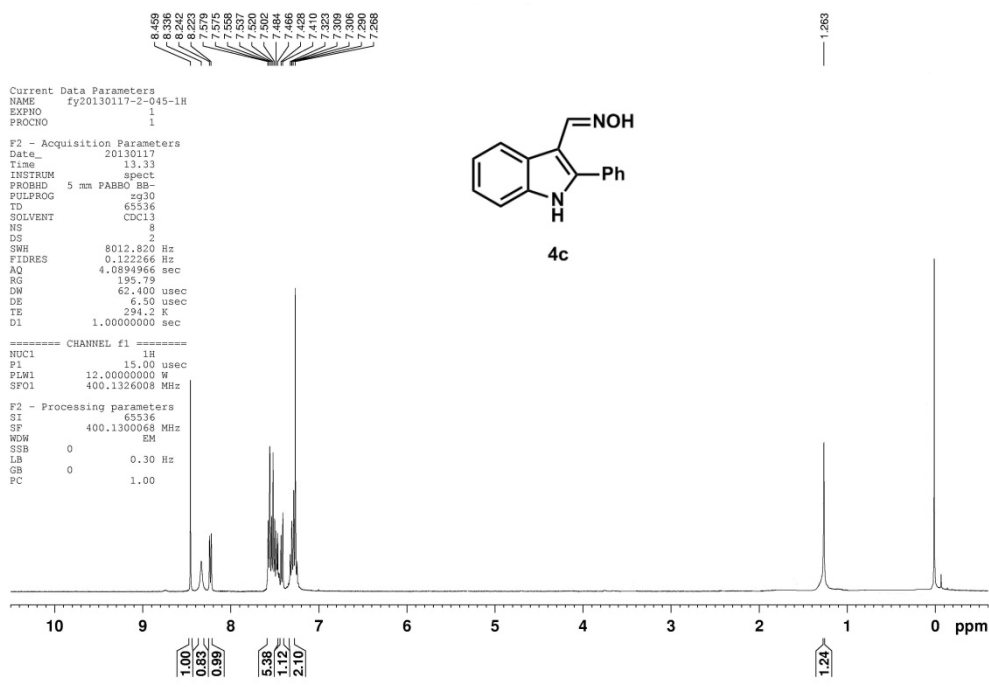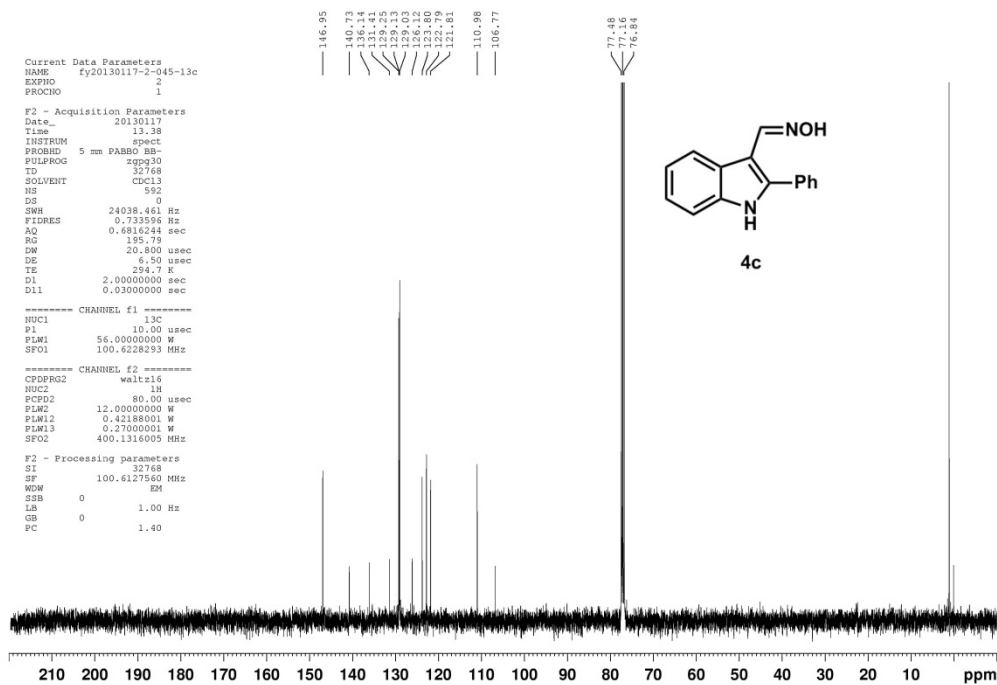

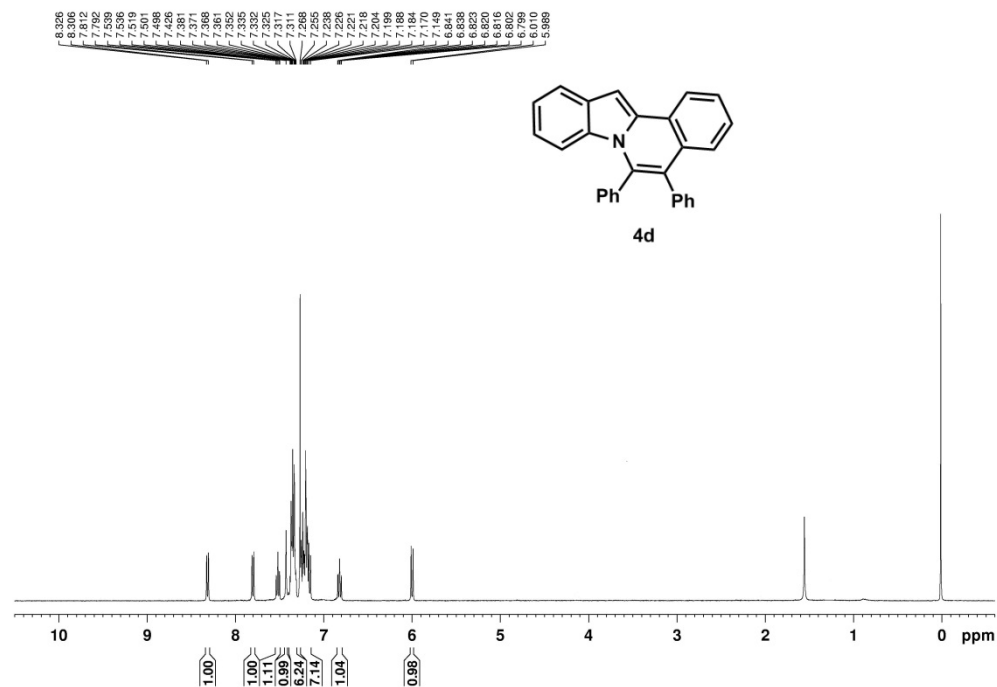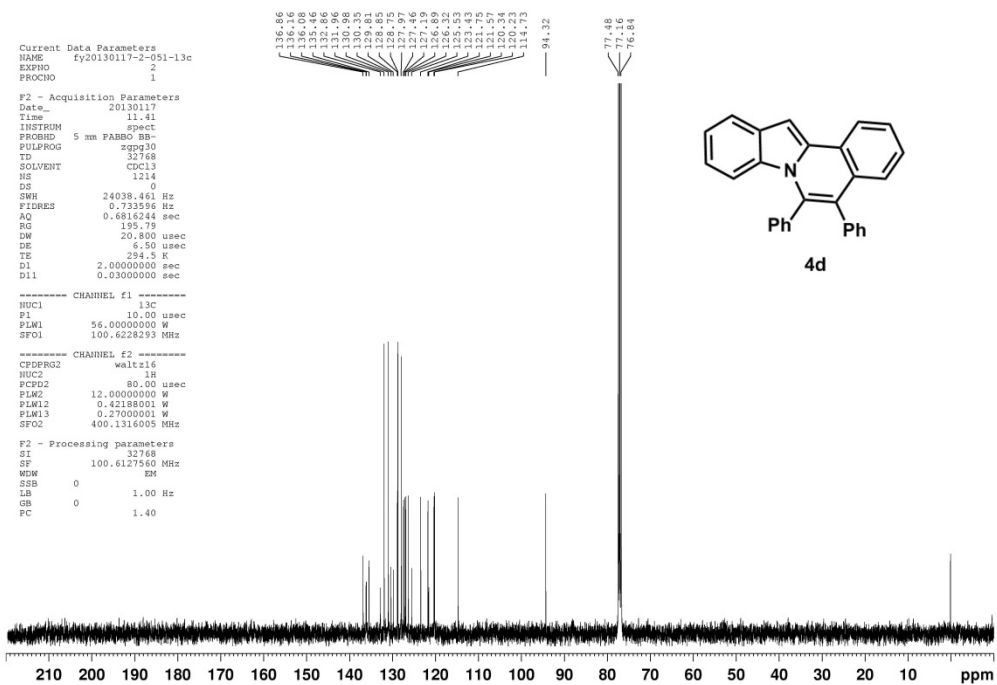

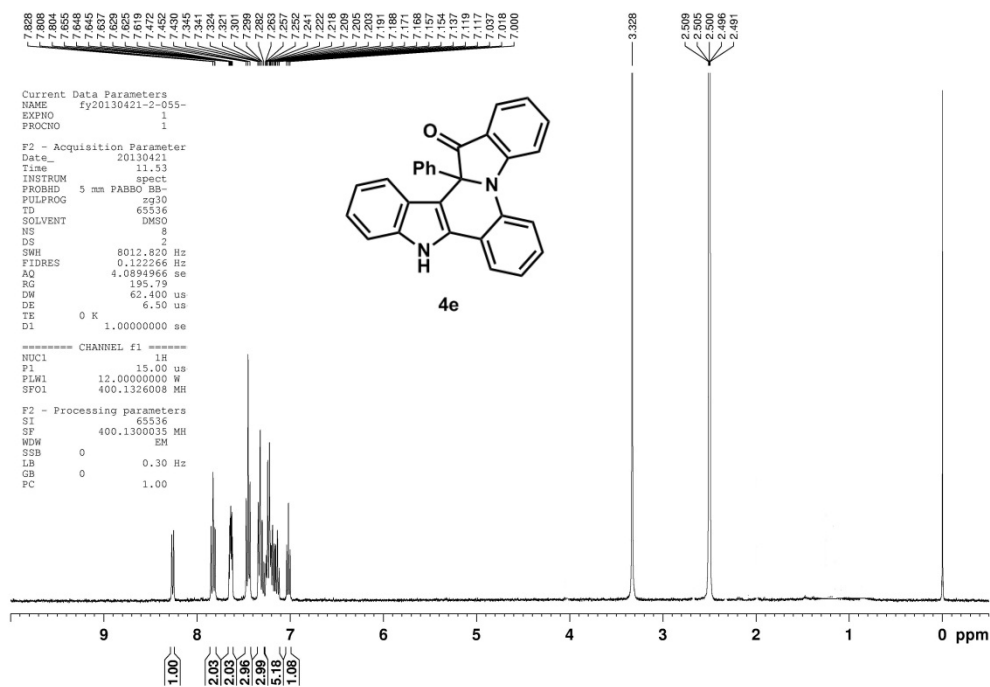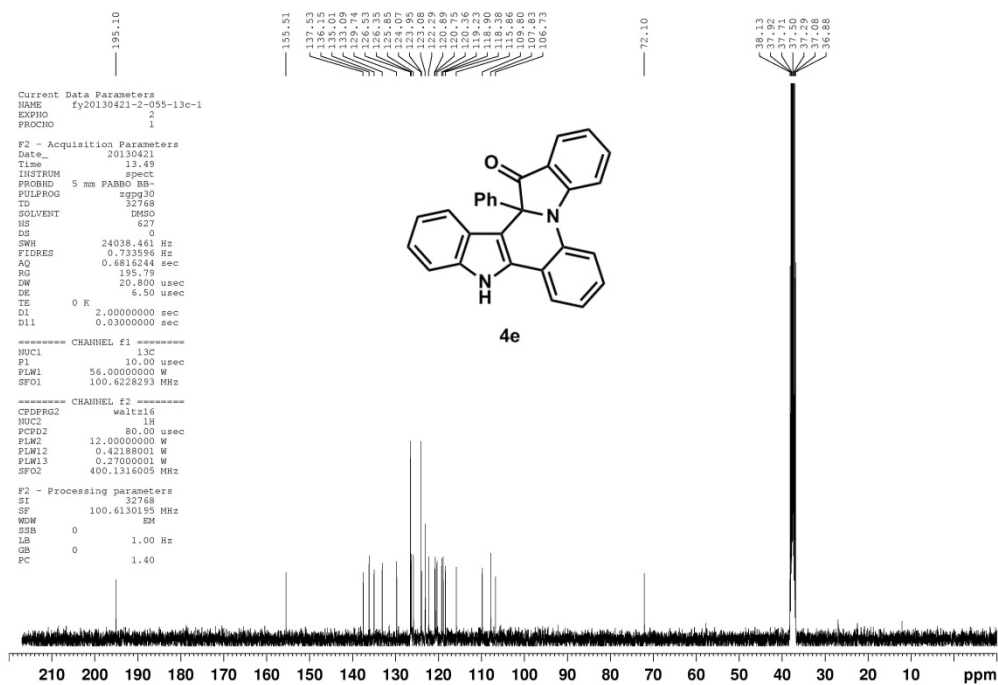

Supplement: c3ob42088d.pdf [file c3ob42088d.pdf]
